# 1 Gating modules of the AMPA receptor pore domain revealed by 2 unnatural amino acid mutagenesis

3 Mette H. Poulsen<sup>#\*2</sup>, Anahita Poshtiban<sup>#1,2</sup>, Viktoria Klippenstein<sup>2</sup>, Valentina Ghisi<sup>2</sup>, Andrew  
4 Plested<sup>§1,2</sup>

5 <sup>1</sup>Institute of Biology, Cellular Biophysics, Humboldt Universität zu Berlin, 10115 Berlin,  
6 Germany <sup>2</sup>Leibniz Forschungsinstitut für Molekulare Pharmakologie (FMP), 13125 Berlin;  
7 NeuroCure, Charité Universitätsmedizin, 10117 Berlin, Germany.

8 <sup>§</sup>To whom correspondence should be addressed: [plested@fmp-berlin.de](mailto:plested@fmp-berlin.de)

9 <sup>#</sup>These authors contributed jointly

10 <sup>\*</sup>Present address: University of Copenhagen, Denmark

11 **Ionotropic glutamate receptors (iGluRs) are responsible for fast synaptic transmission**  
12 **throughout the nervous system. Conformational changes of the transmembrane domain (TMD)**  
13 **underlying ion channel activation and desensitization remain poorly understood. Here, we**  
14 **explored the dynamics of the TMD of AMPA-type iGluRs using genetically-encoded unnatural**  
15 **amino acid (UAA) photo-crosslinkers, p-benzoyl-L-phenylalanine (BzF) and p-azido-L-**  
16 **phenylalanine (AzF). We introduced UAAs at sites throughout the TMD of the GluA2 receptor and**  
17 **characterized these mutants in patch-clamp recordings, exposing them to glutamate and UV light.**  
18 **This approach revealed a range of optical effects on the activity of mutant receptors. We found**  
19 **evidence that an interaction between the Pre-M1 and the M4 TMD helix was essential for normal**  
20 **activation and desensitization. Photoactivation at F579AzF, a residue behind the selectivity filter,**  
21 **had extraordinarily broad effects on gating and desensitization. This observation suggests**  
22 **coupling to other parts of the receptor and like in other tetrameric channels, selectivity filter**  
23 **gating.**

## 24 Introduction

25 The AMPA-type glutamate receptor (AMPA), in common with other ionotropic glutamate  
26 receptors (iGluRs), includes glutamate binding domains that connect to a transmembrane ion  
27 channel pore. Glutamate binding activates the receptor and opens the channel. Despite the  
28 apparent simplicity of this activation principle, the geometries of the receptor involved in  
29 different activation states is unclear. Recently two structures from CryoEM of the active AMPAR  
30 in complex with the auxiliary subunit stargazin were published (Twomey et al., 2017a) (Chen et  
31 al., 2017). However, it remains unclear whether these structures represent fully open channels,  
32 or perhaps conformations corresponding to subconductance openings. We currently lack an  
33 active state structure for any other subtype of iGluR.

34 Numerous studies have investigated the structure and function of extracellular domains of  
35 AMPARs using pharmacological compounds and/or mutational studies (Sun et al., 2002)  
36 (Horning and Mayer, 2004). These studies suggested that desensitization and gating of  
37 AMPARs are principally regulated by the conformation of the ligand binding domain (LBD)  
38 (Carbone and Plested, 2012), while displacements of the amino terminal domains (ATD) have  
39 little effect on AMPAR function (Yelshanskaya et al., 2016a). In contrast to the extracellular  
40 domains, comparatively few studies have examined the dynamics of iGluR pore domains. One  
41 reason for this deficit is the lack of approaches for capturing movements within the  
42 transmembrane domain (TMD).

43 In tetrameric ion channels, two complementary mechanisms of channel gating have been  
44 described. The helical bundle crossing occludes the extracellular end of the AMPAR pore in  
45 closed channel structures solved to date (M3 in iGluRs, S6 in potassium channels), which is also  
46 tightly occluded in Shaker potassium channels (del Camino and Yellen, 2001) and sodium  
47 channels (Oelstrom et al., 2014). But other tetrameric channels including CNG, BK and MthK  
48 exhibit either a partially or fully open bundle crossing, with the selectivity filter acting as a  
49 principal gate (Contreras et al., 2008; Zhou et al., 2011) (Posson et al., 2013; Thompson and

50 Begenisich, 2012). Even in tetrameric ion channels with minimal architectures such as KcsA,  
51 selectivity filter gating underlying C-type inactivation can be coupled to voltage and opening of  
52 the bundle crossing, including gating hysteresis (Blunck et al., 2006; Labro et al., 2018;  
53 Tilegenova et al., 2017) although see: (Devaraneni et al., 2013). Cysteine accessibility  
54 experiments in AMPARs are consistent with a gate at the bundle crossing between resting and  
55 open states (Sobolevsky et al., 2004) but only two sites in the M3 helix of AMPARs could be  
56 studied with membrane impermeant reagents. Moreover, coupling between the selectivity filter  
57 and bundle crossing has not been investigated and may occur in other functional states.

58 Real-time analysis of receptor activity coupled to chemical crosslinking has the potential to  
59 identify sites that have a state-dependent disruption of channel gating. Several techniques to  
60 produce crosslinks between parts of the receptor have been used, including disulfide bonding,  
61 and the introduction of artificial metal binding sites to bridge subunits (Ahmed et al., 2011)  
62 (Lau et al., 2013; Baranovic et al., 2016; Sobolevsky et al., 2004) (Armstrong et al., 2006).  
63 However, these approaches require solvent access to the sites of interest, which is not feasible  
64 for many sites within the membrane embedded channel domain.

65 To study the TMD at arbitrary sites, with the aim of mapping the channel gating pathway in an  
66 unbiased way, we exploited unnatural amino acids (UAAs). We chose UAAs that are reactive  
67 after irradiation with UV light, and that consequently form covalent bonds to nearby protein  
68 segments. We used a well-characterised genetic encoding method that has been shown to be  
69 highly selective and potent in experiments on 7-TM metabotropic receptors and rhodopsin (Ye  
70 et al., 2010; Ye et al., 2009; Ye et al., 2008; Naganathan et al., 2013), potassium channels (Martin  
71 et al., 2016; Murray et al., 2016) and NMDA- and AMPA-subtypes of iGluRs (Klippenstein et al.,  
72 2014; Klippenstein et al., 2017; Tian and Ye, 2016). We inserted individual TAG (amber) stop  
73 codons throughout the TMD of the AMPAR subtype GluA2, rescued these introduced stop  
74 codons with p-benzoyl-L-phenylalanine (BzF) and p-azido-L-phenylalanine (AzF) and  
75 measured the effects of UV exposures on currents induced by glutamate. We also assessed  
76 physical crosslinking with protein biochemistry. These experiments, in concert with analysis of  
77 kinetic mechanisms, revealed an unforeseen extent of control of gating and desensitization by  
78 both core and peripheral elements of the ion channel domain.

## 79 **Results**

80 We hypothesized that structural elements outside the bundle crossing are critically involved in  
81 the channel gating reaction. To investigate this hypothesis, we selected 24 sites in the TMD of  
82 GluA2 to insert either of two photoactivatable UAAs, AzF or BzF (Figure 1A). The size of AzF is  
83 comparable to tyrosine and tryptophan, whereas BzF is bulkier (Figure 1B). Although we  
84 preferred to replace aromatic residues, we selected other amino acids at sites that allowed us to  
85 cover all four membrane segments, M1-M4. In figure 1 (C & D) we also outline the basic results  
86 of the electrophysiological, optical activation and biochemical experiments. This survey already  
87 permits some conclusions about the utility and chemistry of UAA crosslinking in the  
88 transmembrane segments, as we outline below.

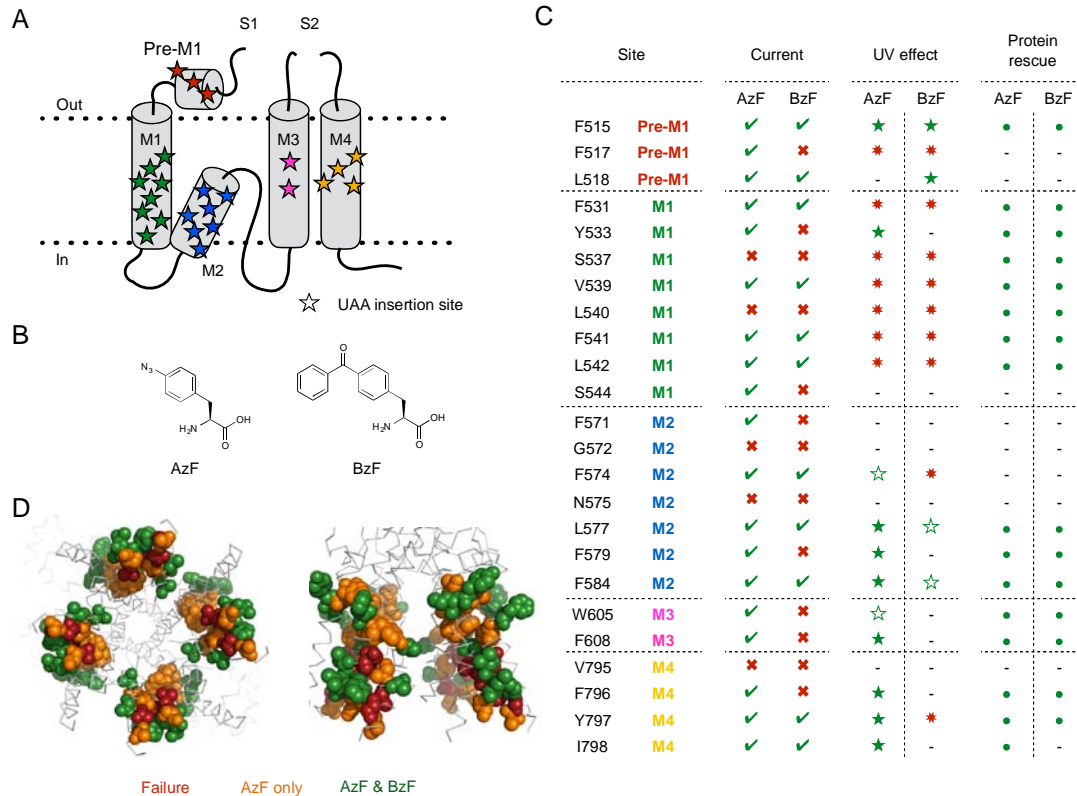

**Figure 1. Site-specific incorporation of AzF & BzF.**

**A** Cartoon of the TMD of one subunit. Stars indicate UAA insertion sites. **B** Chemical structures of AzF and BzF. **C** Summary of electrophysiology, UV effects on currents and expression characteristics. Color-coding of sites according to panel A. Under 'Current', green ticks indicate constructs for which glutamate induced currents could be detected, and red crosses indicate constructs where no currents could be recorded for AzF or BzF incorporation. Receptors were exposed to UV light in the resting and/or desensitized state during electrophysiological recordings. Green filled stars indicate a specific UV-triggered effect and red asterisks indicate no apparent effect of UV light. Unfilled green stars indicate constructs (GluA2-F574AzF, -W605AzF, -L577BzF and -F584BzF) where large rundown in the current amplitude precluded quantitation of any possible slow concurrent UV effects. Recordings of the GluA2-I798BzF mutant had rapid rundown and leak currents that were larger than usual. The currents for GluA2-F571AzF and -S544AzF mutants were too small to permit analysis of UV-driven effects (indicated by hyphens). Western blot analysis indicated that "rescue" of translation was successful for all the constructs tested, indicated by filled green circles. A hyphen also indicates no test.

**D** Representation of insertion sites shown as color-coded spheres in a GluA2 crystal structure (PDB ID: 3kg2). Red spheres indicate failure of both AzF and BzF to rescue functional receptors ('Current' column in panel C), whereas orange spheres indicate successful insertion of only AzF and green spheres indicate successful insertion of both AzF and BzF.

First, we found insertion sites in all helices at which we could rescue functional channels at the plasma membrane. At 19 of the 24 sites, typical fast glutamate-activated currents could be recorded from channels harbouring AzF. At 11 of these sites, BzF also produced functional channels. There were no sites at which the bulkier BzF could preferentially rescue channel function. Viewed on the basis of crystal structures of GluA2, a further aspect of functional rescue was apparent. Sites that readily accommodated both amino acids tended to be found at the circumference of the membrane domain, whereas sites that produced non-functional channels for both AzF and BzF tended to be centrally located around the channel pore. An intermediate layer of sites was permissive for AzF alone (Figure 1D).

117 At 9 of the 19 sites rescued by AzF, we could detect a robust alteration of channel gating upon  
118 exposure to UV light. We explore in more detail the nature of these changes below. Strikingly,  
119 we could not determine a robust effect of BzF photoactivation on currents for any of the sites  
120 tested, except for the peripheral sites at F515 and L518 in the “Pre-M1” helix, which are likely to  
121 be outside the plasma membrane in any case. We did detect a weak effect of UV exposure when  
122 BzF was incorporated in the M2 helix at position 577, however, the effect was hard to separate  
123 from current rundown. The absence of distinct UV-induced changes on receptor function for  
124 constructs containing BzF is surprising in light of experiments in which membrane domains  
125 were crosslinked with Benzophenone [PMID: 11524017], but may relate to water accessibility  
126 in such sites. The only water accessible sites in the AMPAR pore domain are likely to be in the  
127 M3 helix (Sobolevsky et al., 2005) (Sobolevsky et al., 2003) (Salussolia et al., 2011) and BzF  
128 failed to produce functional channels at these sites.

129 A possible confounder of these results was that a lack of glutamate-activated current expression  
130 was because of a failure to translate the polypeptide chain. Therefore, we performed  
131 biochemical experiments to assess rescue of expression. These experiments confirmed that for  
132 both AzF and BzF, inclusion of the UAAs and the requisite synthetase and exogenous tRNA were  
133 sufficient to strongly enrich expression of the full-length subunits (Figure 1C, Supplementary  
134 Figure 1 and Supplementary Table 1, range 5- to 3500-fold increase in band intensity for 10  
135 mutants). On average, wild-type receptors showed no change in expression level in the  
136 presence of the UAAs and the incorporation machinery. These experiments do not provide  
137 information about the maturity of the tetrameric form of the receptor, or about surface  
138 expression, but do indicate that deficits due to UAAs were either in assembly and/or gating, not  
139 in a gross absence of translation of the full-length polypeptide chain.

140 To assess whether functional receptors rescued by AzF and BzF were valid congeners of wild-  
141 type receptors, we assessed their desensitization, deactivation and recovery from  
142 desensitization. Example traces are plotted in Figure 2 and analysis of the kinetics of nine  
143 mutants is provided in Supplementary Table 2. Out of all the mutants tested, only insertion of  
144 AzF at position 798 had any appreciable effect on kinetics slowing the rate of entry to  
145 desensitization to  $50 \pm 5 \text{ s}^{-1}$  ( $n = 6$  patches) compared to  $120 \pm 10 \text{ s}^{-1}$  for wild-type receptors  
146 ( $n = 36$  patches). Overall, the range of deactivation rates was from  $1200 \text{ s}^{-1}$  to  $2200 \text{ s}^{-1}$ ,  
147 compared to the average wild-type value of  $1600 \pm 120 \text{ s}^{-1}$  ( $n = 27$ ) and the recovery from  
148 desensitization ranged from  $45 \text{ s}^{-1}$  to  $70 \text{ s}^{-1}$  compared to the average wild-type value of  $55 \pm 5 \text{ s}^{-1}$   
149 ( $n = 17$ ) (Figure 2; Supplementary Table 2). Therefore, we took the mutants in their basal  
150 state, before any UV exposure, to have gating largely representative of GluA2 wild-type (WT)  
151 channels.

### 152 **Patterns of UV-induced inhibition**

153 Previously, we generated photo-inactivatable AMPARs by inserting BzF in the extracellular  
154 domains of GluA2 (Klippenstein et al., 2014). Due to their incorporation sites, these mutations  
155 were expected to trap an inactive state if they formed crosslinks. Here, we chose sites on a  
156 pseudo-random basis, without any particular expected photo-crosslinking effect. For five of the  
157 AzF mutants, the effect of UV illumination was a rapid, irreversible loss of the peak current  
158 response (Figure 3A-D; Supplementary Table 3). Independent of the location (in any of the four  
159 membrane segments, M1-4), we could inhibit the peak current by up to 95%. The fastest  
160 inhibitory action was observed for the F608AzF mutant, with a time constant of 1.5 s for  
161 cumulative exposures to UV (in intervals of 200 ms per episode) for reduction of the peak  
162 current to  $4 \pm 1\%$  of its original value (barely distinguishable from background noise;  $n = 17$ ,

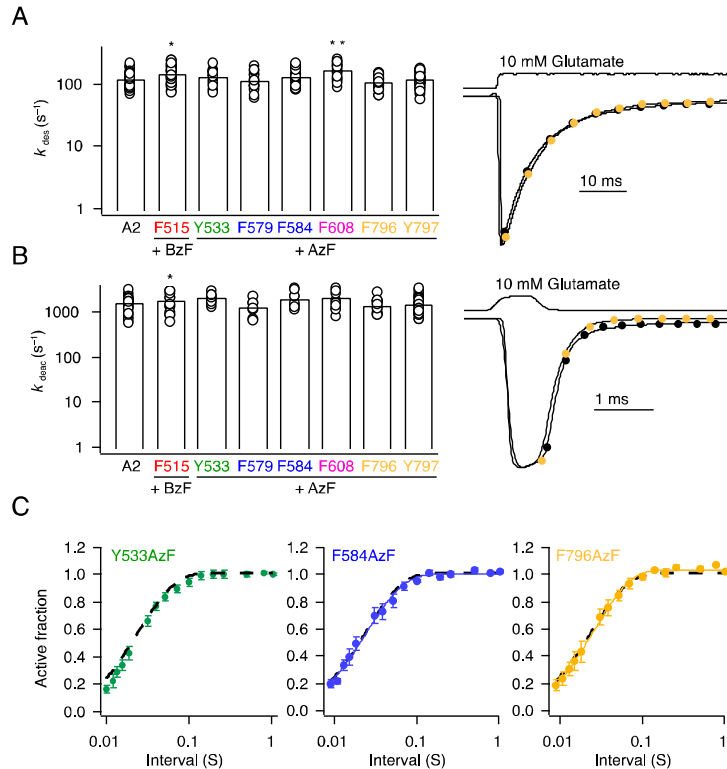

163

164

**Figure 2. Kinetics of GluA2 receptors harboring AzF or BzF in the transmembrane domain.**

165

**A** Bar graph (*left*) summarizing desensitization rates of selected GluA2 constructs with AzF or BzF.

166

\*\*Significant difference GluA2 WT vs. mutant ( $p < 0.001$ , t-test), \* Significant difference GluA2 WT vs.

167

mutant ( $p < 0.05$ , t-test). Traces (*right*) illustrating the rate of desensitization of GluA2 WT (*black*) and

168

F796AzF (*yellow*). **B** Bar graph (*left*) summarizing deactivation rates for selected constructs with AzF or

169

BzF after a brief (1 ms) pulse of 10 mM glutamate. Traces (*right*) illustrate the rate of deactivation of

170

GluA2 WT (*black*) and F796AzF (*yellow*). **C** Pooled data for recovery from desensitization of GluA2 WT

171

(black dotted line), GluA2-Y533AzF (green), -F584AzF (blue) and -F796AzF (yellow). See Supplementary

172

Table 2 for a summary of rates.

173

Figure 3C and Supplementary Table 3). We were able to control the speed of inactivation by

174

changing the intensity of the UV light (50% to 100%) or the time interval of UV exposure per

175

episode (50 ms and 200 ms) (Supplementary Figure 2). We exposed receptors to UV light in

176

resting and desensitized states by opening the shutter at the appropriate stages of each episode.

177

To examine the active state, we initially blocked desensitization with cyclothiazide (CTZ), but

178

found that CTZ itself could induce a UV-sensitive inhibition (Supplementary Figure 3) that

179

varied from batch to batch. To avoid this problem, we instead performed experiments on the

180

background of the L483Y mutation for all constructs, with the exception of F608AzF-L483Y,

181

which did not express. For this particular construct, F608AzF, the UV induced inhibition in

182

presence of CTZ was much faster than the CTZ-driven UV dependent inhibition of GluA2 WT

183

(see Supplementary Table 3). Surprisingly, the effects of UV exposure were independent of the

184

functional state of the receptor. Values for all the constructs tested that showed UV dependent

185

inhibition are reported in Supplementary Table 3. As previously reported (Klippenstein et al.,

186

2014), we controlled for non-specific rundown of currents by pausing the UV exposures in the

187

course of some experiments, observing that the peak current remained stable, and then

188

reverting to UV-driven inhibition.

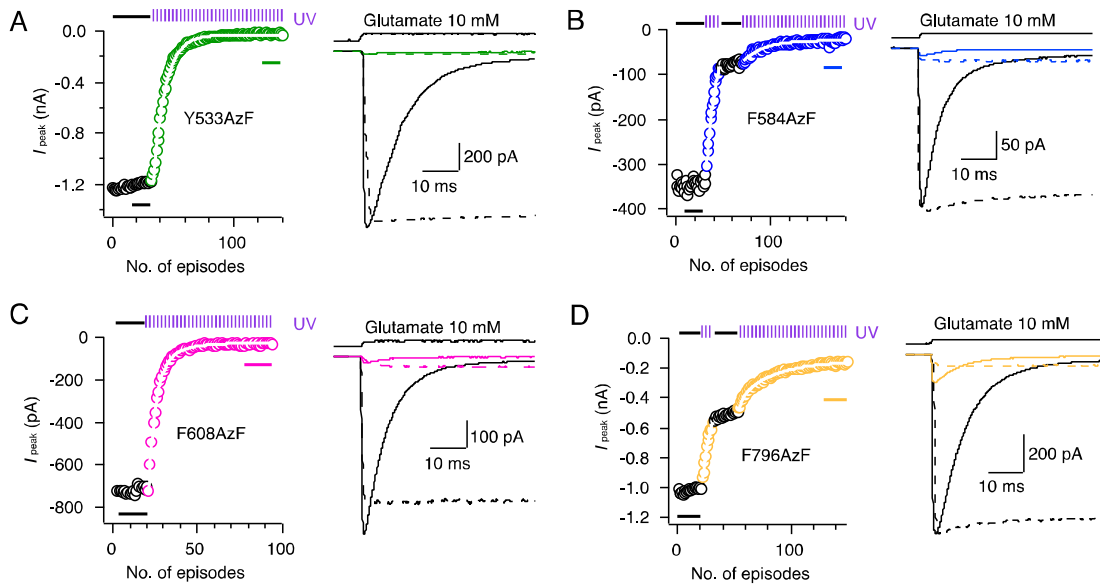

189  
190  
191  
192  
193  
194  
195  
196  
197  
198  
199  
200  
201

**Figure 3. UV-triggered inhibition of glutamate-induced currents.**

**A-D Left;** Examples of kymograms illustrating the time course of receptor photo-inactivation for the selected GluA2 constructs. Each episode included a 400 ms application of 10 mM glutamate (each circle represents the peak current of the response). A 200 ms exposure of UV epi-illumination was made in each episode (indicated in the kymogram by violet pulse trains and colored circles). The rate of peak current reduction was monoexponential (white outlined fits). There was no significant difference between monoexponential half-times in different states of activation. **Right;** Traces representing averages of 5–20 responses to glutamate before UV exposure (black trace) and after UV exposure (colored) in either the resting or desensitized state (solid lines, taken from points indicated by bars in kymogram) and fully active state (corresponding L483Y mutant, dotted line). It was not possible to record any glutamate induced current from GluA2-L483Y-F608AzF, therefore CTZ was used to block desensitization for this construct.

202  
203  
204  
205  
206  
207  
208  
209  
210  
211  
212  
213  
214

Such a consistent pattern of inhibitory action might argue for a non-specific loss of channel function, but several observations counter this proposition. As shown previously (Klippenstein et al., 2014), GluA2 WT receptors were insensitive to UV light (Supplementary Figure 4A), as were some mutants. For example, F531AzF was reliably rescued by AzF but showed no UV sensitivity at all (Supplementary Figure 4B), speaking against non-specific photo-destructive effects based on AzF. A further control was provided by the F584TAG mutant in the absence of any UAA. All permissive AzF mutants had some degree of readthrough (that is, background rescue in the absence of UAA). The F584TAG mutation had the largest readthrough currents on average, similar in magnitude to those in the presence of AzF (Supplementary Table 4). However, unlike responses from receptors containing the AzF residue, the responses obtained (in the absence of AzF) were entirely insensitive to UV illumination. A typical recording from the F584TAG mutant from a cell cultured in the absence of AzF is shown in supplementary figure 4C.

215  
216  
217  
218  
219  
220  
221

Although these controls gave us confidence that the inhibitory effects were site-specific, the behaviour of several other mutants provided more compelling evidence. For example, the F796AzF mutation in M4 was inhibited by UV, but inhibition was incomplete reaching only about 85%. In addition, we found that incorporating AzF in M2 at position F579 also resulted in inhibition upon UV illumination, but only to 75% and with a concomitant increase in steady-state current (see below and Supplementary Table 3). This suggests that the effects of AzF activation within the transmembrane domain are site-specific.

222

## 223 Photopotiation

224 As would be expected from an unbiased screen of the gating region, in addition to inhibition, we  
 225 also found four mutants that had a strong potentiating effect on function. For F515BzF the peak  
 226 current was on average increased 1.6-fold, with a larger 2.5-fold increase in the relative steady-  
 227 state current compared to the peak current size (Figure 4 and Supplementary Table 3). Peak  
 228 current was also increased for the non-desensitizing LY mutant indicating an effect on gating,  
 229 not a simple block of desensitization (Sun et al., 2002). Glutamate-activated peak and steady-  
 230 state currents were similarly increased for L518BzF by 1.3-fold and 7.8-fold, respectively  
 231 (Figure 4). As expected from a stabilisation of the open state, paired measurements in the same  
 232 patch (before and after UV exposure) showed the rate of entry to desensitization

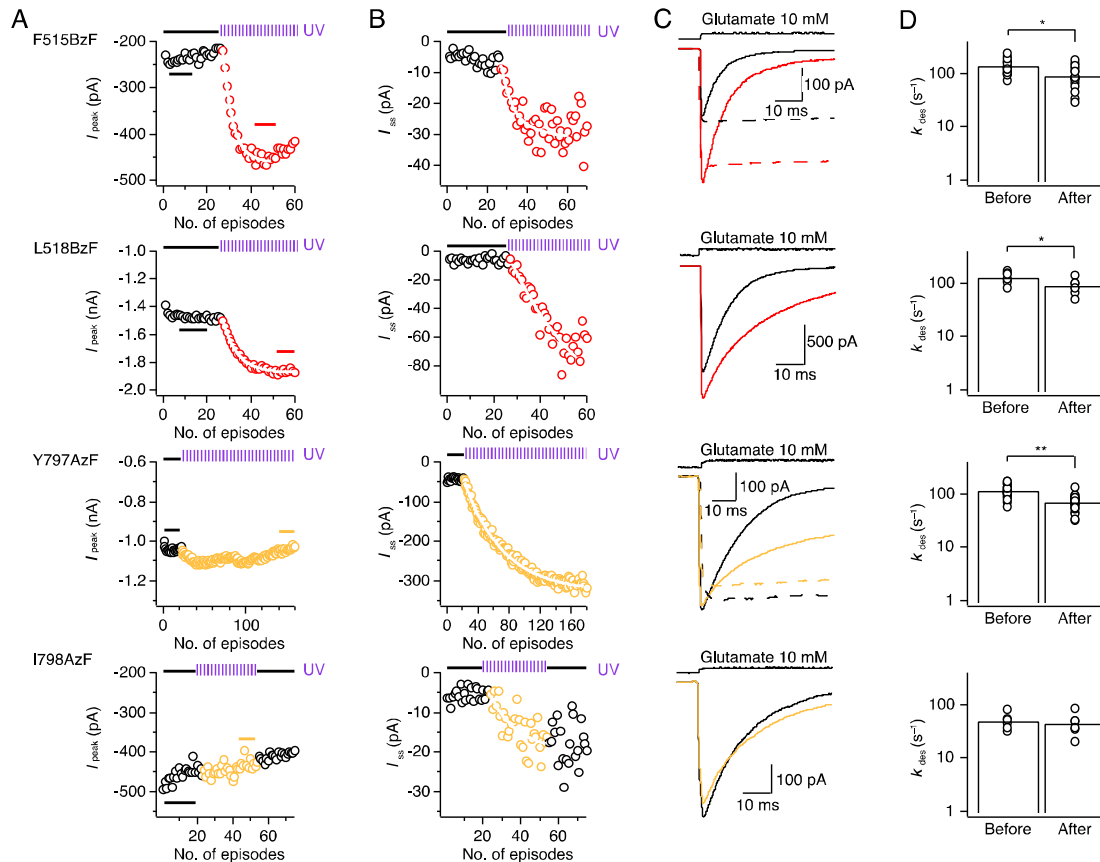

233 **Figure 4. UV-triggered potentiation of AMPAR responses.**

234 **A-B** Example kymograms illustrating the time course of the potentiation of peak (**A**) and steady state (**B**)  
 235 current for GluA2-F515BzF (*top row*), GluA2-L518BzF (*second row*) GluA2-Y797AzF (*third row*) and  
 236 GluA2-I798AzF (*bottom row*). The rate of peak current potentiation was monoexponential (white  
 237 outlined fits). **C** Example current traces representing averages of 5–20 responses to glutamate before UV  
 238 exposure (black trace) and after UV exposure (colored) in either the resting or desensitized state (solid  
 239 lines, taken from points indicated by bars in kymogram). Representative currents from the corresponding  
 240 L483Y mutants (active state UV exposure, dotted lines) are shown for F515BzF and Y797AzF. **D** Bar  
 241 graphs summarize desensitization rates in 10 mM glutamate of GluA2-F515BzF, -L518BzF, -Y797AzF and  
 242 -I798AzF before and after UV exposures (see Supplementary Table 2 for a summary of rates).  
 243 was slowed (from  $140 \pm 10 \text{ s}^{-1}$  to  $90 \pm 10 \text{ s}^{-1}$ ,  $n = 19$  and  $130 \pm 10 \text{ s}^{-1}$  to  $90 \pm 10 \text{ s}^{-1}$ ,  $n = 7$ , for  
 244 F515BzF and L518BzF, respectively). An analysis including both paired and non-paired data is  
 245 in Supplementary Table 2.

246 A similar effect on receptor activation behaviour was seen for AzF introduced in M4 at position  
 247 Y797, with an increase in the steady-state current (3.7-fold), presumably corresponding to the

248 block of desensitization (from  $120 \pm 5 \text{ s}^{-1}$  to  $70 \pm 5 \text{ s}^{-1}$ ,  $n = 24$ ) (Figure 4). Similarly, the  
249 relative steady-state current increased, albeit more variably, following UV exposure when AzF  
250 was incorporated into the neighbouring M4 position at I798 (fold increase of  $7 \pm 3$ , Figure 4  
251 and Supplementary Table 3). The extent of photopotential of the steady-state currents did  
252 not correlate with the initial size of the relative steady-state currents before the application of  
253 UV light ( $R^2$  range from 0.06 to 0.2, Supplementary Figure 5). Notably, desensitization was  
254 slowed by incorporating AzF at position I798 and did not change with exposure to UV light  
255 (from  $50 \pm 5 \text{ s}^{-1}$  to  $45 \pm 10 \text{ s}^{-1}$ ,  $n = 6$ ) (Figure 4). Since the I798AzF construct showed  
256 pronounced rundown, we were unable to determine deactivation and recovery from  
257 desensitization kinetics before and after applying UV light.

258

### 259 **The interaction between the Pre-M1 and M4 helices.**

260 The confluence of the functional results in terms of potentiation of constructs with BzF in Pre-  
261 M1 (F515BzF, L518BzF) and AzF in M4 (Y797AzF, I798AzF) led us to ask what structural  
262 dynamics could produce these effects. Inserting the mutated residues into the closed state  
263 structure of GluA2 provides a striking hypothesis: reciprocal crosslinking between these two  
264 sites is physically plausible (Figure 5A). The BzF substitution at position 515 is located on the  
265 outer face of the Pre-M1 helix, but a rotation or outward bloom of this “collar” (Twomey et al.,  
266 2017a) could allow the photoactivated BzF radical to contact the M4 helix. Likewise, the AzF at  
267 797 is likely buried within the membrane but conformational change could allow it to reach  
268 multiple crosslinking partners. Rotations of M4 could permit crosslinking onto M3 or M1 of the  
269 neighbouring subunit, but approach of the Pre-M1 helix from the same subunit, as envisaged  
270 above, could also bring this residue into potential contact.

271 Intersubunit crosslinks, like those previously seen for the S729BzF mutant (Klippenstein et al.,  
272 2014) were negligible for GluA2 WT receptors and all mutants that we tested (Supplementary  
273 Table 1). To test our hypothesis of reciprocal crosslinking between Pre-M1 and M4 within  
274 subunits, we used a principle based on a previously published study (Xu et al., 2013), as  
275 illustrated in Figure 5B. Using antibodies to label both N- and C- termini, we used quantitative  
276 Western blotting to determine the protection against protease digestion afforded by  
277 crosslinking. We expected to detect intrasubunit crosslinking if the UV-activated UAA was able  
278 to physically connect fragments divided by an inline tobacco-etch virus (TEV) cleavage site.  
279 Following brief UV exposures of 2 and 5 minutes, the F515BzF mutant harbouring a TEV  
280 cleavage site showed a small but reproducible increase in the protected monomer fraction  
281 (Figure 5C-D). Based on the location of F515 in structures of GluA2, and our failure to detect any  
282 increase in dimers or higher order oligomers, this result indicates cross-linking to M4 of the  
283 same subunit. The Y797AzF and I798AzF mutants did not show detectable monomer protection  
284 (Figure 5C-D), indicating that the effects in electrophysiological experiments likely arise either  
285 from a ring-expansion of the phenyl ring, or crosslinking to lipid. Both interpretations require a  
286 movement of M4 (see discussion). These exposures to UV light were about 100-fold less intense  
287 than those experienced by receptors during patch clamp experiments and epi-illumination by  
288 UV (Klippenstein et al., 2014), therefore the total exposure over a few minutes should be similar  
289 to those in electrophysiology experiments. Longer exposures of 15-30 minutes, which we  
290 previously used to test for dimer (and higher order) fractions, were not relevant for the rapid  
291 changes in the gating properties that we were concerned with.



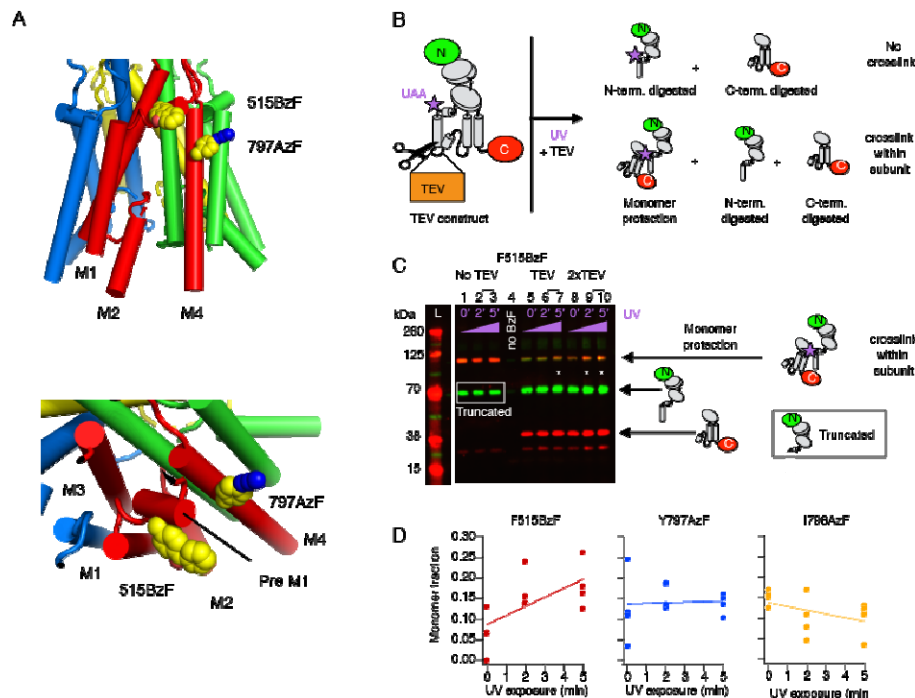

292 **Figure 5. Intra-subunit crosslinking by BzF.**

293 **A** Structure of the TMD with AzF and BzF incorporated at sites 797 and 515, respectively, illustrating the  
 294 close proximity of the two sites. **B** Cartoon of the TEV construct and fragments generated by TEV protease  
 295 treatment. A site for TEV protease recognition was introduced in the M1-M2 intracellular loop of the  
 296 GluA2 subunit as well as a C-terminal FLAG-tag epitope and a TAG mutation for incorporation of UAA  
 297 (*violet star*). Covalent bridging within a subunit of the two fragments arising from TEV protease  
 298 treatment should “protect” a monomeric subunit band on western blots. **C** Exemplary western blot  
 299 showing monomer protection of GluA2-F515BzF. For all conditions the band at 63 kDa corresponds to  
 300 GluA2 truncated at residue 515. The truncated band is undistinguishable from the digested N-terminus  
 301 when TEV protease is added (64 kDa). *Lane 1-3*: Quantitation of the rescue of F515TAG construct in cells  
 302 by BzF, showed a monomeric band at 100 kDa. A band from subunits truncated at the TAG site (63 kDa) is  
 303 present, presumably pulled down in FLAG purification with full-length subunits. *Lane 4*: The omission of  
 304 only the UAA results in no rescue of monomeric band. A band corresponding to subunits truncated at the  
 305 TAG site can be visualized on the blot, however the band is very faint, presumably due to a lack of any  
 306 FLAG epitope. *Lane 5-7*: Quantitation of GluA2-F515BzF treated with TEV protease showed an increase of  
 307 monomer fraction with longer exposure to UV. *Lane 8-10*: Exposing GluA2-F515BzF to twice the amount  
 308 of TEV protease (relative to lane 5-6) led to an increase in protection of monomers, indicating more  
 309 crosslinking events. **D** Summary of the monomeric fraction plotted against the UV exposure time. Only  
 310 insertion of BzF in position 515 showed an increase in monomer protection over time.

311 **Structural mapping of photoactive sites**

312 The effects of UV exposure on the peak, relative and absolute steady-state current of rescued  
 313 receptors are summarised as bar plots in figure 6. We mapped these effects onto a structure of  
 314 the GluA2 TMD (PDB: 3KG2; Figure 6B). These plots suggested gradients in the peak and  
 315 steady-state current effects, but any correlations are weak ( $R^2 = 0.3$  for the fold change in peak  
 316 current against radial distance; Supplementary Figure 6). The weakness of these relations is not  
 317 surprising, given that the chemistry of individual side chain environments as well as local  
 318 motions must influence the effect of a given residue on channel gating motions.

319 Structures of GluA2 in resting, active and desensitized states are now available, so we next  
 320 asked if the displacement of residues between structures could be related to the photo-  
 321 activated effects on currents. We selected two nominally resting structures bound with

322 antagonists (5L1B and 5VHZ), two active state structures with open pores (5VOT and 5WEO)  
323 and two desensitized state structures (5VOV and 5WEK). These structures were obtained in  
324 both the presence and absence of different auxiliary proteins, which may contribute to  
325 variations between them. We aligned them on the basis of their membrane embedded segments  
326 and measured per-subunit distances between residues in structures, and also took radial  
327 displacements by halving distances between diametrically-opposed subunits (e.g. A and C, and  
328 B and D; Supplementary Figure 7).

329 Measurements of distances between residues in different states produced a complex picture  
330 indicating considerable structural plasticity both within and between functional states. The two  
331 open state structures are quite similar, but the variability between the closed state structures  
332 was high (Supplementary Figure 7C) and accounts for almost all the variability found in C-  
333 alpha positions between “closed” and “open”. Notably, the most variable regions are the  
334 selectivity filter and the top of the M4 helix.

335 Finding no clear relation between geometry and the functional effect, we produced a 2-D map of  
336 gating changes after UV exposure (Figure 7A), plotting the peak current change against the  
337 relative steady-state current change. The plot delineates a cluster of null mutants, and two clear  
338 groups for which functional changes emerged, whereas the F579AzF mutant was a striking  
339 outlier. In the first of the two groups, peak current was inhibited and the steady-state current  
340 concomitantly increased (Figure 7A, purple circles). In the second group, a robust increase in  
341 steady-state current was accompanied with either increase or no change in the peak current  
342 (Figure 7A, green circles). Notably, F579AzF could be described as an outlier in plots of peak  
343 current and steady-state current against geometry (Supplementary Figure 6).

344 Simulations based on a simple single binding site model of AMPARs (Carbone and Plested,  
345 2012; Carbone and Plested, 2016) can mimic the behaviour of these two groups (Figure 7B-D).  
346 The behaviour of the first group of mutants on the 2-D plot was reproduced by progressively  
347 reducing the lifetime of the desensitized state AD2 or by allowing the desensitized state to  
348 become weakly conductive (Figure 7B-D). The kinetic behaviour of the second group of mutants  
349 was reproduced by altering the channel shutting rate  $\alpha$  or the opening rate  $\beta$  (Figure 7B-D). The  
350 quantitative agreement between the 5-fold increase in the steady-state current accompanied by  
351 a 50-fold reduction in the peak current predicted by this model, and the effects on actual  
352 mutants (e.g. 608AzF) is notable. Most importantly, these simulations indicated that  
353 crosslinking at the F579 position is complex in nature, and must involve multiple effects on  
354 kinetic model parameters, where both the lifetime of desensitization and channel opening rate  
355 change (Figure 7B-D). A further manipulation, allowing the desensitised state to become  
356 progressively weakly conductive gave the best description (Figure 7B-D).

357 Figure 7E (and Movie 1) illustrates four classes of residues that we could segregate by analogy  
358 to kinetic models of AMPAR activation. The residues form contiguous clusters in the TMD,  
359 suggesting that they correspond to functional modules that execute distinct gating functions.  
360 Such modules strongly resemble the “conformational wave” model of AChR receptor gating  
361 (Grosman et al., 2000). We do not know the extent to which these “modules” are independent,  
362 or coupled within a common pathway, or the extent to which they are disrupted or highlighted  
363 by crosslinking.

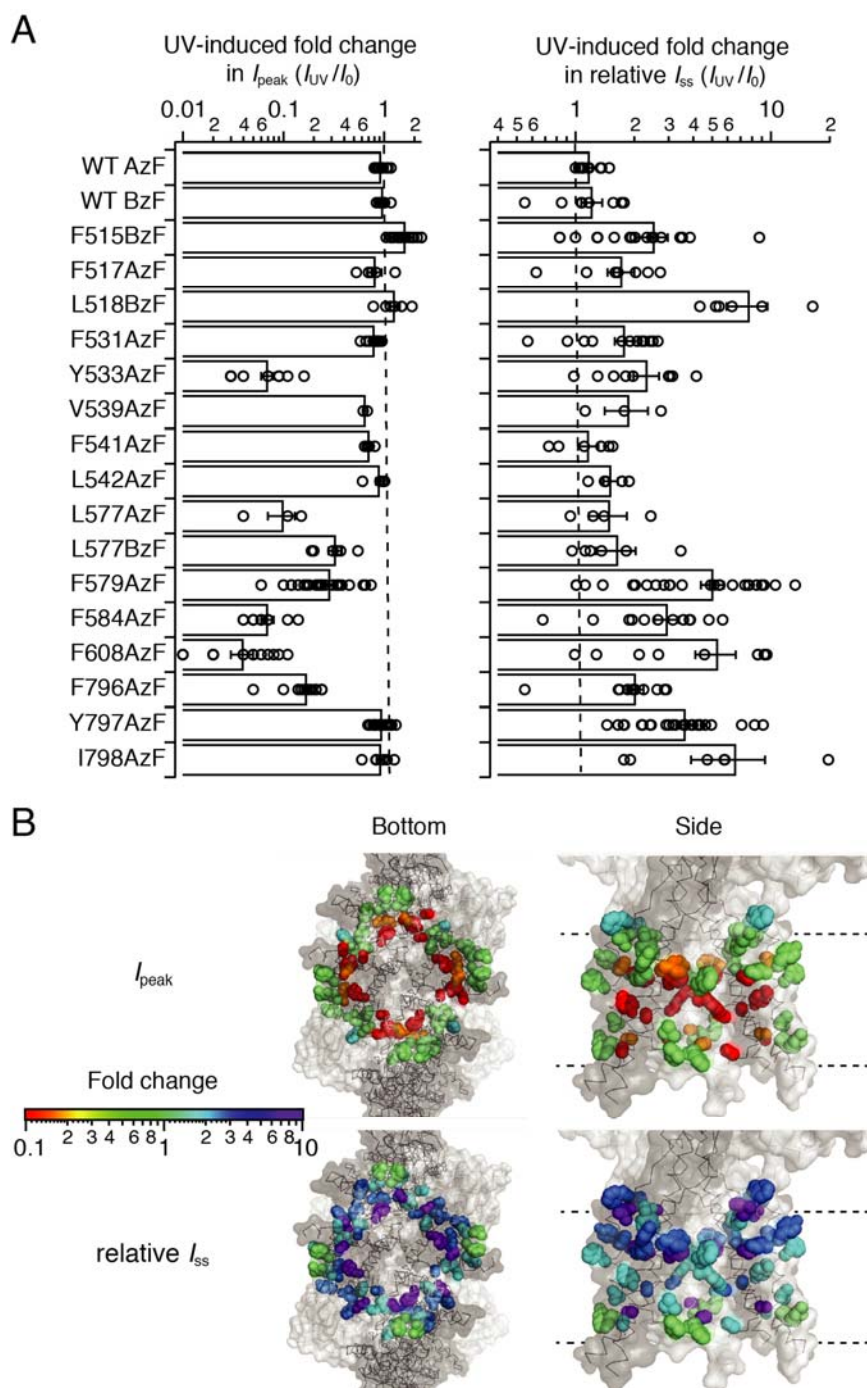

364

365 **Figure 6. Segregation of sites by UV effect.**

366 **A** Bar graph (*left*) representing the summary of the change in peak current before ( $I_0$ ) and after UV ( $I_{\text{UV}}$ )  
 367 of selected GluA2 constructs with AzF or BzF incorporated in the TMD. Small reductions in peak current  
 368 (like for GluA2-F517AzF) are likely due to rundown and not related to the application of UV. Bar graph  
 369 (*right*) summarizing the fold change in steady-state current relative to the peak current. **B** Bottom  
 370 and side view of structures showing AzF and BzF insertion sites as spheres colored according to their UV-  
 371 dependent changes in peak current amplitude (*upper*) and relative steady-state current (*lower*). Each  
 372 site is highlighted in color in all four subunits. The color scale (*left*) is representing the colors used to  
 373 show the fold change measured for each construct.

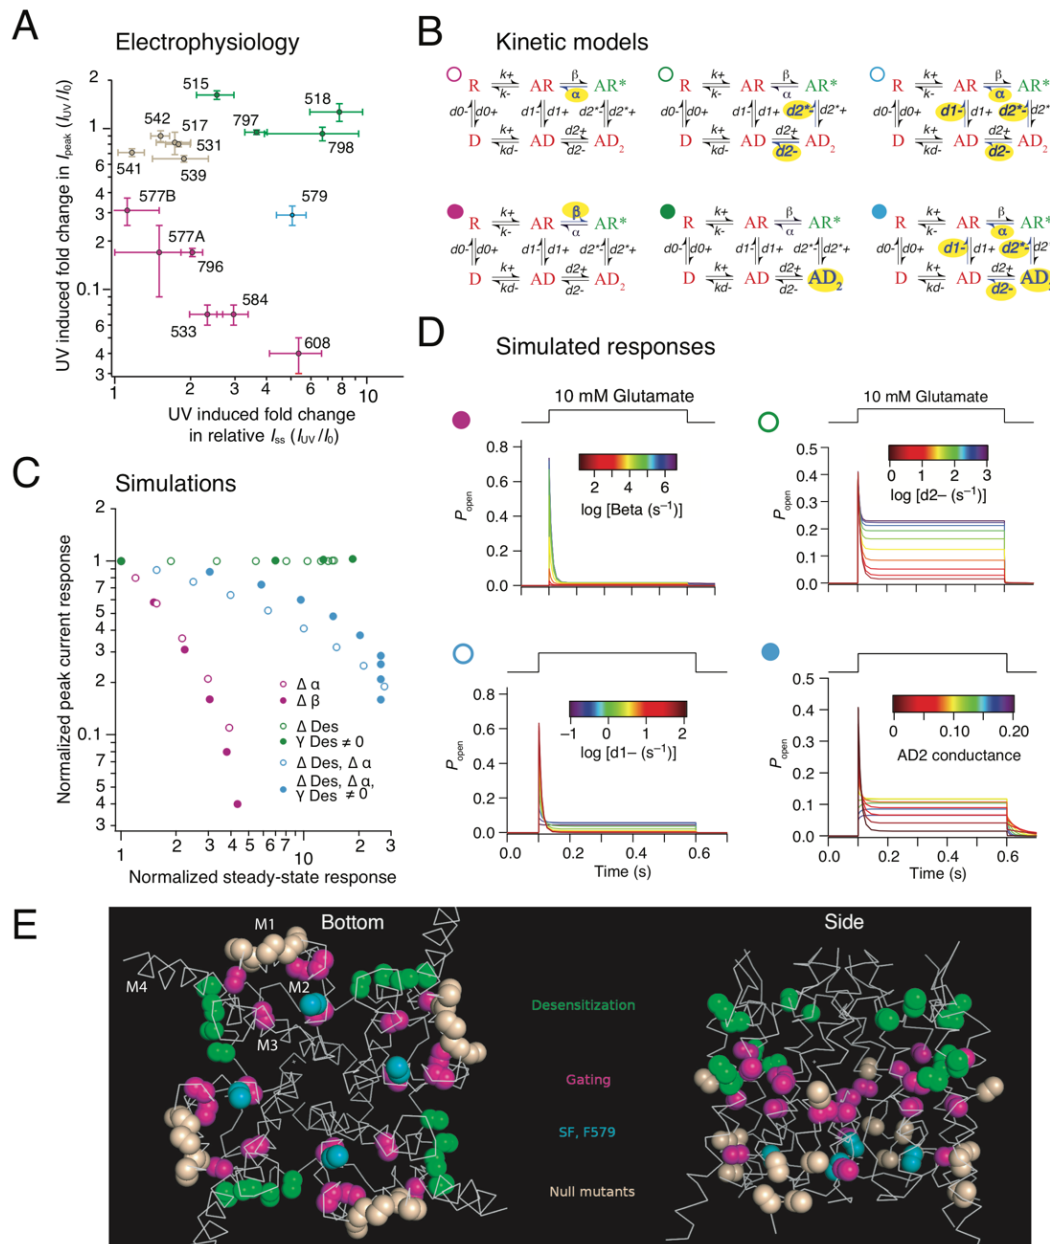

374 **Figure 7. Segregation based on gating properties** **A** 2-D plot shows the relation between the mean UV-  
375 induced changes in peak and relative steady-state current before ( $I_0$ ) and after UV ( $I_{UV}$ ) at each site. Sites  
376 are color-coded according to the effect: null in wheat; potentiation in green; inhibition in purple and  
377 intermediate (579) in cyan, the same color code applies to each panel. **B** Simplified single binding site models of  
378 AMPAR gating. Open state ( $AR^*$ ) is green, shut states (including desensitized states  $D$ ,  $AD$  and  $AD_2$ ) are  
379 red. Rates or states that were varied in each simulation are highlighted in yellow. **C** A 2-D plot, resembling  
380 the 2-D plot in panel A, but derived from simulations of the kinetic models described in panel B.  
381 Progressive alteration of the channel shutting and opening rate ( $\alpha$  and  $\beta$ , purple circles), changes in  
382 desensitization rates ( $d2$ , open green circles) or  $AD_2$  becoming conductive (filled green circles). Changes  
383 to both gating and desensitization are needed to obtain the intermediate behavior (cyan circles). **D**  
384 Simulated responses from kinetic models (indicated with colored circles as in panel B) used to construct  
385 panel C, with traces colored according to the rate constant indicated. **E** Gating modules in the AMPAR  
386 pore. The major classes of mutants form contiguous modules; a desensitization module (green; collar), a  
387 gating module (magenta; bundle crossing) and peripheral mutations with no effect (null mutants, wheat).  
388 The selectivity filter mutant with complex behavior is F579AzF (cyan).  
389  
390

391 **Complex role in receptor kinetics of the F579 site**

392 A complicated kinetic model was needed to mimic the position of F579AzF in the 2-D gating plot  
393 (Figure 7). Therefore, we reasoned that complex UV-driven changes in gating at this site might  
394 be detectable in patch clamp recordings. To address this point, we pursued a more  
395 detailed investigation of kinetics, including recovery from desensitization, at both an  
396 intermediate time point in cumulative UV exposure (~2 s) and after saturating exposure (8s).

397 Kymograms of the UV effects on peak current and steady-state response are shown in Figure 8A.  
398 As in our initial analysis, peak current inhibition by UV was incomplete, reaching only about  
399 75% (Figure 8A and Supplementary Table 3). This was also true for the non-desensitizing  
400 L483Y variant, indicating that reduced channel gating, rather than increased desensitization,  
401 was responsible for this inhibition. In these experiments, the rate of entry to desensitization  
402 was reduced by almost one third after saturating UV exposure time of 8s (from  $k_{des} = 130 \pm 15$   
403  $s^{-1}$  to  $k_{des} = 45 \pm 10 s^{-1}$ ,  $n = 9$ , Figure 8B), whereas intermediate cumulative exposure time of 2s  
404 showed desensitization rates similar to control ( $k_{des} = 110 \pm 10 s^{-1}$ ). Paradoxically, steady-state  
405 currents activated by 10 mM glutamate increased to about 10% of the peak (Figure 8B).  
406 Likewise, the deactivation rate following a 1 ms pulse of 10 mM glutamate was also  
407 substantially slowed (from  $1410 \pm 140 s^{-1}$  to  $700 \pm 140 s^{-1}$  (2s UV) and  $500 \pm 140 s^{-1}$  (8s UV),  
408  $n = 9$ , Figure 8C). Both these effects on gating developed strongly at early stages of UV exposure  
409 (that is, after only 2 s).

410 As expected from our kinetic modelling, the effect on desensitization was not simple. To this  
411 end, also recovery from desensitization was slowed (from  $k_{rec} = 40 \pm 5 s^{-1}$  to  $k_{rec} = 20 \pm 5 s^{-1}$   
412 (2s UV) and  $k_{rec} = 15 \pm 5 s^{-1}$  (8s UV),  $n = 9$ , Figure 9A-B). One caveat for this measurement is  
413 that control measurements on the GluA2 WT receptor, expressed on the background of AzF and  
414 its cognate synthetase, showed a small slowing of recovery after UV exposure (from  $55 \pm 4 s^{-1}$   
415 to  $38 \pm 2 s^{-1}$ ,  $p = 0.008$ , paired t-test,  $n = 9$  patches, Supplementary Table 2). The effect on  
416 F579AzF mutants was much more substantial, and quite different to control measurements,  
417 with a “quiescent phase” where no effective response was detected for about 30 ms following  
418 the conditioning pulse (Figure 9A). Measuring recovery was hampered by the peak current  
419 inhibition but also by the development of an unusual long decay in the current after the  
420 desensitizing pulse. This “off-relaxation” following desensitization was much slower after only a  
421 brief UV exposure, (from  $k_{off} = 150 \pm 60 s^{-1}$  to  $k_{off} = 30 \pm 5 s^{-1}$  (2s UV) and  $k_{off} = 35 \pm 5 s^{-1}$  (8s  
422 UV),  $n = 9$ , Figure 9C). These measurements also revealed that the steady-state current  
423 increased in absolute magnitude. There was no concomitant effect on the resting state  
424 conductance – the patches did not become leaky.

425 By comparing effects on kinetics at intermediate and saturating UV exposures, it was clear that  
426 the onset of UV-driven effects in F579AzF was not coherent. The slowing effect on the tail  
427 current ( $k_{off}$ ) and deactivation as well as the slowing of recovery from desensitization were  
428 pronounced already at 2 s, whereas effects on the steady-state current and the rate of entry to  
429 desensitization developed later (Figure 10A). These distinct time courses are further evidence  
430 that photoactivation of the F579AzF mutant has an unprecedented effect on multiple functional  
431 states of the AMPAR. This observation is consistent with a high structural variability at the  
432 selectivity filter region (at the cytoplasmic end of the channel; Figure 10B and C) both between  
433 and within states.

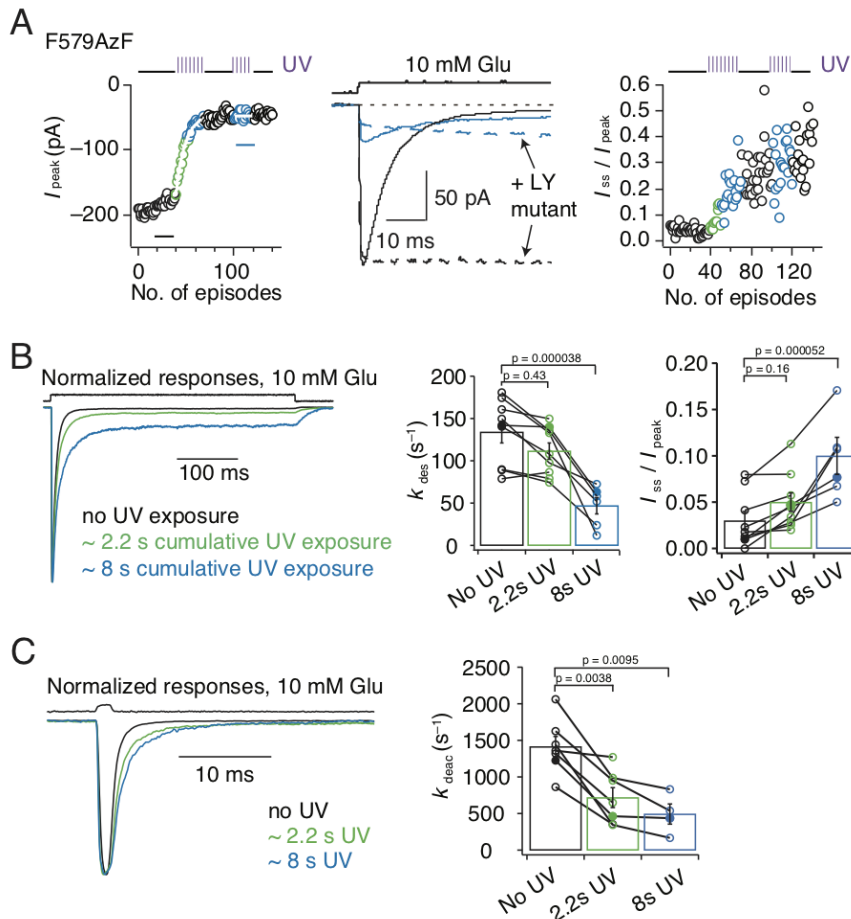

434 **Figure 8. Broad role of the M2 segment in activation and desensitization.**

435 **A** Kymograms illustrating the time course of incomplete inhibition for GluA2-F579AzF peak current  
 436 responses to 10 mM glutamate (*left*) and increase in the relative steady-state current (*right*). Example  
 437 current traces (*middle*) representing averages of 10 responses to glutamate before UV exposure (black  
 438 trace) and after UV exposure (cyan) in desensitized state (solid lines) and fully active state  
 439 (corresponding L483Y mutant, dotted line). **B** Exemplary normalized traces for desensitizing responses  
 440 to a 400 ms glutamate pulse, before (black), during (2.2 s, green) and after (8 s, blue) UV exposure. Bar  
 441 graph shows rates of desensitization, relative steady-state current ( $I_{\text{ss}}/I_{\text{peak}}$ )  $\pm$  SEM before, after 2.2 s and  
 442 after 8 s of UV exposure from paired recordings:  $k_{\text{des}} = 130 \pm 15 \text{ s}^{-1}$  ( $n = 9$ ),  $k_{\text{des}} = 110 \pm 10 \text{ s}^{-1}$  ( $n = 9$ )  
 443 and  $k_{\text{des}} = 50 \pm 10 \text{ s}^{-1}$  ( $n = 6$ );  $I_{\text{ss}}/I_{\text{peak}} = 0.03 \pm 0.01$  ( $n = 9$ ),  $I_{\text{ss}}/I_{\text{peak}} = 0.05 \pm 0.01$  ( $n = 9$ ) and  $I_{\text{ss}}/I_{\text{peak}} =$   
 444  $0.1 \pm 0.02$  ( $n = 6$ ). **C** Exemplary normalized traces for responses to a 1 ms application of 10 mM  
 445 glutamate, with the same color code as panel B. Bar graph shows rates of deactivation before, during and  
 446 after UV, respectively:  $k_{\text{deac}} = 1400 \pm 140 \text{ s}^{-1}$  ( $n = 7$ ),  $k_{\text{deac}} = 700 \pm 140 \text{ s}^{-1}$  ( $n = 7$ ) and  $k_{\text{deac}} = 500 \pm 140$   
 447  $\text{s}^{-1}$  ( $n = 4$ ). Solid symbols indicate the rates for the responses shown in the left panels. Error bars  
 448 represent SEM.

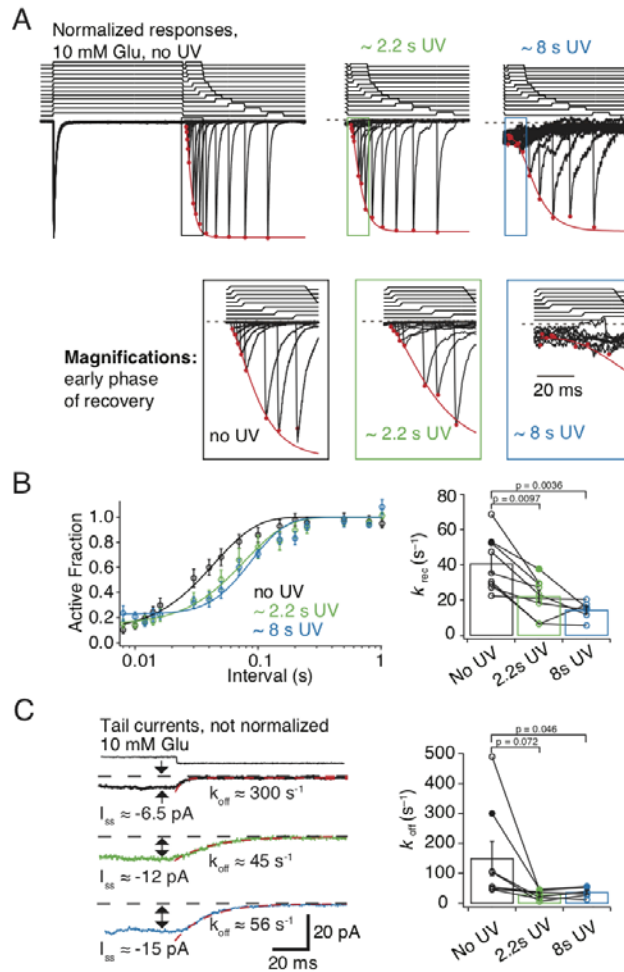

449 **Figure 9. Role of the M2 segment in desensitized states.**

450 **A** Exemplary normalized traces for recovery from desensitization before, during (2.2 s, green) and after  
 451 (8 s, blue) UV exposure. Time courses of glutamate applications are shown above the traces. Red circles  
 452 indicate the peak of the response, fitted with a recovery function (red line). Apparent increase in noise  
 453 following 8 s of UV exposure appears from performing a zoom on the trace, to be able to find the  
 454 remaining glutamate induced current. **B** Recovery curves from pooled data are shifted to the right with  
 455 cumulative UV exposure. Bar graph summarizing paired recovery from desensitization protocols before,  
 456 during and after 8 s of UV exposure. Solid symbols refer to the patch in panel **A**. Recovery rates  $\pm$  SEM  $k_{rec}$   
 457 =  $40 \pm 5$   $s^{-1}$  ( $n = 9$ ),  $20 \pm 3$   $s^{-1}$  ( $n = 9$ ) and  $k_{rec} = 15 \pm 2$   $s^{-1}$  ( $n = 6$ ) before, during and after UV,  
 458 respectively. **C** Exemplary traces for tail currents after desensitization. Bar graph of decays after the  
 459 steady-state current before, during and after UV exposures, with solid symbols referring to the traces  
 460 shown in the left panel. Deactivation rates  $\pm$  SEM are  $k_{off} = 150 \pm 60$   $s^{-1}$  ( $n = 9$ ),  $k_{off} = 30 \pm 5$   $s^{-1}$  ( $n=9$ )  
 461 and  $k_{off} = 35 \pm 10$   $s^{-1}$  ( $n = 6$ ) before, during and after UV, respectively. Error bars represent SEM.



462 **Discussion**

463 Despite the recent release of structures of activated GluA2 receptors (Twomey et al., 2017a;  
 464 Chen et al., 2017) to compare with cognate closed state structures (Sobolevsky et al., 2009;  
 465 Chen et al., 2014; Dürr et al., 2014), the nature and complexity of conformational changes  
 466 occurring at the level of the TMD of AMPARs during gating remains unclear. Previous work  
 467 supports the idea that M3 lines the pore and an upper hydrophobic box (Kuner et al., 2003;  
 468 Alsaloum et al., 2016) and M2 comprises the selectivity filter region (Kuner et al., 2001).  
 469 Conversely, the roles of the M1 and M4 helices are less well studied. In this work, site-specific  
 470 incorporation of photoactivatable crosslinkers (Klippenstein et al., 2014) enabled access to the  
 471 entire TMD of homomeric GluA2 AMPARs. A key advantage of this method is that function can  
 472 be assessed before, during and after the photoactivation. Critically, crosslinking potential was  
 473 independent of solvent exposure, allowing us to build a relatively unbiased map of functional  
 474 elements in the TMD, covering sites that were previously inaccessible, and relate these elements  
 475 to structural data. This factor was decisive in revealing complex relationships between the Pre-  
 476 M1 and M4 helices and the selectivity filter region and channel activation and desensitization.

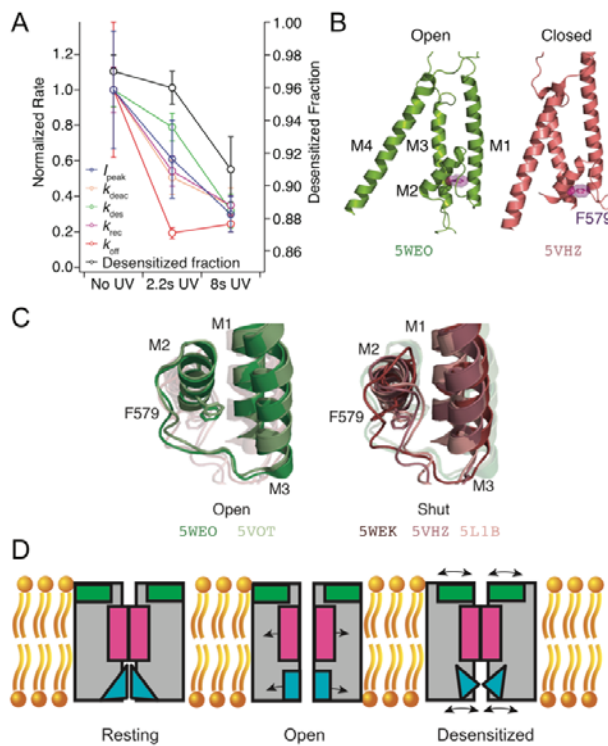

477  
 478

479 **Figure 10. Putative AMPA receptor gating modules.**

480 **A** The time courses of UV-dependent gating changes in the F579AzF mutant (details in Figure 8 and 9).  
 481 Desensitization changes (desensitized fraction and  $k_{des}$ ) developed over longer cumulative exposures  
 482 than deactivation ( $k_{deac}$ ) or the long decay after a desensitized pulse ( $k_{off}$ ). For the inhibition of the peak  
 483 current ( $I_{peak}$ ) before, during (2.2 s) and after (8s) UV exposure:  $p = 0.34$  (paired t-test between no and  
 484 2.2s UV) and  $p = 0.0095$  (repeated measures ANOVA). **B** The F579 site is located immediately behind the  
 485 selectivity filter. Overlay of the TMD of a single subunit from closed (red) and open (green) GluA2  
 486 channel, with the four transmembrane helices (M1-4) indicated. **C** Overlays of open and closed channel  
 487 structures showing F579 in multiple conformations. The PDB codes are indicated in the corresponding  
 488 colors. **D** Scheme of gating modules. Channel opening requires a “bloom” at the M3 segment (gating  
 489 module, magenta), and a conductive selectivity filter (cyan). Desensitization is accompanied by  
 490 movements of the desensitization module (green) and potentially by structural dynamics of the  
 491 selectivity filter.



492 The incorporation of bulky AzF and BzF residues had at most minor effects on the kinetics of  
493 channel activation, gating or desensitization of GluA2 before exposure to UV. The facility of  
494 these UAAs to be incorporated into the TMD depended on their environment and chemistry  
495 (Figure 1). Unsurprisingly, sites proximal to the phospholipid membrane (at the TMD  
496 periphery) were more likely to provide enough space for the insertion of both AzF and BzF,  
497 whereas the ion channel core was less permissive. However, the periphery was not insensitive  
498 to insertion of AzF and BzF, and I798AzF in M4 had, in contrast to other sites, basal kinetics  
499 (that is, before UV exposure) that differed from GluA2 WT. Following UV exposure, long lived (>  
500 50 ms) single channel bursts could be observed for the I798AzF mutant (Supplementary Figure  
501 8). These findings augment previous studies showing that insertion of tryptophan in sites of the  
502 peripheral TMD can disrupt transmembrane interactions and receptor tetramerization  
503 (Salussolia et al., 2011; Salussolia et al., 2013). At sites that were permissive, we found that  
504 approximately 50% of the AMPARs rescued by incorporation of AzF showed a change in  
505 channel gating upon UV exposure, while incorporation of BzF only showed an UV-induced effect  
506 in three cases out of 11 (Figure 1), two of which were at the membrane periphery. This superior  
507 capability of AzF in the TMD might be due to its greater mobility to rotate and cross-link to  
508 nearby carbohydrates, relative to BzF (Tian and Ye, 2016). Overall, UV-induced control of  
509 receptor activity was independent of the functional state and which membrane helix harboured  
510 the AzF residue. These observations favour the idea that all four membrane segments rearrange  
511 upon receptor activation in order to open the channel pore, or to permit receptor  
512 desensitization. The wide range of potential interacting partners for AzF or BzF in each state of  
513 activation may have precluded state-dependency. It is conceivable that UV illumination in  
514 different states result in crosslinking to various membrane segments or lipid parts of the  
515 bilayer, to yield the same effects.

516 Previous work suggested that a disulfide bond between the Pre-M1 and M4 helices could inhibit  
517 channel opening (Yelshanskaya et al., 2017). Four mutants clustered at the collar region (F515,  
518 L518, Y797, I798) had similar UV-dependent effects, unique to this gating module (Figure 7E,  
519 10D). Our functional and biochemical data indicate that an adventitious crosslink, or  
520 interactions between Pre-M1 and M4, can also have a potentiation effect, and block  
521 desensitization (Figure 4). When BzF was incorporated in the likely solvent-exposed sites in the  
522 Pre-M1 helix (F515BzF and L518BzF) BzF crosslinking potentiated receptor currents (Figure  
523 4). Biochemical analysis showed no intersubunit crosslinks, but we found a robust UV-induced  
524 increase in intrasubunit crosslinking, by quantifying monomeric protection of GluA2-F515BzF  
525 subunits cleaved by TEV protease. This result indicates a rotation of the Pre-M1 segment  
526 towards M4 of the same subunit (Figure 5D). This type of interaction has also been speculated  
527 for NMDA receptors (NMDARs) (Amin et al., 2017; Ogden et al., 2017). Furthermore, while  
528 NMDAR M4 segments have subunit-specific effects on desensitization, it has been shown that  
529 the extreme intracellular end of AMPAR M4 segments only contribute weakly to desensitization  
530 (Amin et al., 2017). Desensitization after photoactivation of Y797AzF was strongly reduced.  
531 Comparing this to our recent FRET data suggesting the M4 (as assayed from the C-terminal  
532 movement) is likely to move during gating, desensitization and without pore opening  
533 (Zachariassen et al., 2016), a wider role for peripheral interactions to modulate AMPAR  
534 function appears likely. We did not detect crosslinking either within or between subunits for  
535 Y797AzF. The effect in desensitization might thus be explained either by ring expansion of the  
536 AzF having a steric effect or by crosslinking to a lipid. We recently showed that interaction  
537 between the LBD-M4 linker and Stargazin is sufficient for modulation of GluA2 (Riva et al.,  
538 2017), thus raising the prospect that the perturbation at this site in M4 (Y797AzF), pointing  
539 away from the core of the channel, could be related to the changes in receptor function effected  
540 by auxiliary proteins, which in fact interact with the M4 and M1 of the AMPAR (Zhao et al.,  
541 2016; Twomey et al., 2017a). Notably, in some patches, we could detect that following  
542 photoactivation of AzF at position 798, glutamate could activate long bursts of channel openings  
543 with high open probability (Supplementary Figure 8), much like the incorporation of Stargazin  
544 produces (Tomita et al., 2005).

545 A distinct group of mutants flanking the bundle crossing (Figures 7E and 10D) showed  
546 properties likely resulting from an inhibition of the channel opening reaction, either by slowing  
547 channel opening, or destabilisation of the open state. F608 in the M3 helix showed the most  
548 potent inhibition. A kink at A618 allows the upper segment of M3 to move substantially upon  
549 channel opening (Twomey et al., 2017a), but F608 seems to move much less (Supplementary  
550 Figure 7). The fast rate of UV-inhibition at this site might therefore simply reflect the necessity  
551 of M3 movement to open/close the channel.

552 Both the structural and functional analyses of crosslinking sites indicated that F579AzF, located  
553 in close proximity to the selectivity filter at the base of the M2 helix, has a special role in gating  
554 of the receptor. In this context, the variation of the selectivity filter structure (and likewise its  
555 disordered nature in some other structures), including between closed state structures, and  
556 steric hindrance of the open channel selectivity filter structure by F579 are of interest (Figure  
557 10C). Inhibition of the peak current was in the case of F579AzF accompanied by a large increase  
558 in the steady-state current. Mimicking these changes in a kinetic model required concurrent  
559 destabilization of both the open state and the desensitized state. The idea that desensitization  
560 can be affected by a residue deep in the channel in the M2 helix, was confirmed by the slowing  
561 of recovery from desensitization measured after UV exposure of GluA2-F579AzF (Figure 9).  
562 Notably, recovery happens entirely whilst the channel is closed. Therefore, crosslinking at this  
563 site had a dual effect on desensitization, slowing both entry and recovery (2.9-fold each), as well  
564 as separately biasing the open-closed equilibrium (because the peak current was substantially  
565 inhibited). Finally, we note that comparing our results to structures directly was generally  
566 unproductive (Supplementary Figure 6), whereas we readily discerned functional groups of  
567 residues by analyzing a 2-D plot of electrophysiological properties (Figure 7). This 2-D plot of  
568 peak vs. steady-state responses presumably gives insight because it compares the energies of  
569 modifying channel opening transitions and modifying receptor desensitization.

570 Overall, the effects of the F579AzF mutation following UV exposure are complex, and the extent  
571 of changes to the current have distinct dependencies on UV exposure. Our results do not  
572 distinguish between subunit dosage effects, that develop with a different dependence on the  
573 number of reacted subunits, or trapping of distinct structural forms. More work will be needed  
574 to dissect how the different UV-dependent changes occur. The model that gave the best  
575 description of the F579AzF data included progressive shift of the desensitized state towards a  
576 small conductance. In practice, such a phenomenon (the development of a new conductive state  
577 with UV exposure) may not be related to desensitization, but the relaxation from the steady-  
578 state current (from the tail current kinetics, Figure 9C) matched that of recovery from  
579 desensitization. However, our observations strongly corroborate the idea that the selectivity  
580 filter of AMPARs is as dynamic a structure as it is in simple tetrameric channels, with distinct  
581 arrangements between states (Twomey et al., 2017a). This property might allow the selectivity  
582 filter region to function as a second ion gate, closing and opening the pore between certain  
583 functional states as in other tetrameric channels. Further work will be required to assess  
584 whether state-dependent ion transit through the selectivity filter is a feature of the AMPAR  
585 transmembrane domain.

## 586 **Materials and Methods**

### 587 **Molecular Biology**

588 The aminoacyl-tRNA-synthetase and tRNA constructs for Human embryonic kidney (HEK) cell  
589 expression (Ye et al., 2008, Ye et al., 2009) were kind gifts from Thomas Sakmar (Rockefeller).  
590 For electrophysiological studies we used the pRK5 expression vector encoding the flip splice  
591 variant of the rat GluA2 subunit containing a Q at the Q/R-filter, followed by IRES and eGFP. The  
592 mutation Y40TAG was introduced into eGFP to act as a reporter of rescue (described in  
593 Klippenstein et al. 2014). Amber stop codons were introduced by overlap PCR and confirmed by  
594 double-stranded DNA sequencing. To study the active state of GluA2, a mutation (L483Y) was  
595 introduced that blocks receptor desensitization and stabilises an open state. (Sun et al., 2002)  
596 The pRK5 vector was also used for biochemical experiments, but for this purpose the GluA2  
597 subunit carried a C-terminal FLAG-tag epitope (Lau et al., 2013) for purification and three  
598 cysteines deleted (C190A, C436S, C528S) to lower background subunit dimerization  
599 (Klippenstein et al., 2014). The TEV protease recognition site 'ENLYFQGS' was inserted  
600 immediately before W572 in the M1-M2 intracellular loop with the native E571 being part of  
601 the TEV site (Xu et al., 2013).

602

### 603 **Cell culture and transfection**

604 HEK293T for biochemical experiments and HEK293 cells for electrophysiological experiments  
605 were maintained in Minimum Essential Medium (MEM, Sigma-Aldrich) supplemented with 10%  
606 serum and 5% penicillin/streptomycin and grown at 37°C with 5% CO<sub>2</sub>. HEK293 and HEK293T  
607 cells were transiently transfected using polyethylenimine (PEI) in a 1:3 ratio (v/v; DNA/PEI)  
608 one day after cells were seeded. To suppress the amber stop codon, GluA2 mutants were co-  
609 expressed with vectors encoding mutated tRNA and synthetase for either AzF or BzF in the  
610 mass ratio 4:1:1. After six hours of incubation, the transfection medium was replaced by MEM  
611 supplemented with AzF (0.5 mM) or BzF (1 mM). We dissolved BzF (Bachem) in 1 M HCl and  
612 AzF (Chem-Impex International) in 1 M NaOH, which was immediately added to pre-warmed  
613 MEM containing 10% serum. Media supplemented with BzF or AzF were adjusted to pH 7.3 and  
614 filter-sterilized (0.22 µm PVDF filter) before use (Ye et al., 2009; Hino et al., 2006). Control  
615 experiments on wild-type receptors were done on the background of the AzF or BzF synthetase  
616 and the UAA medium.

617

### 618 **Electrophysiology**

619 Patch clamp recordings of outside-out patches from HEK cells expressing mutant and wild-type  
620 glutamate receptors were performed 2-3 days after transfection. The external solution was  
621 composed as follows (mM): 150 NaCl, 0.1 MgCl<sub>2</sub>, 0.1 CaCl<sub>2</sub>, 5 HEPES. The pipette solution  
622 contained the following (mM): 115 NaCl, 0.5 CaCl<sub>2</sub>, 1 MgCl<sub>2</sub>, 10 Na<sub>2</sub>ATP, 10 NaF, 5 Na<sub>4</sub>BAPTA, 5  
623 HEPES. Both solutions were titrated with NaOH to pH 7.3. Glutamate was diluted in the external  
624 solution and was applied to outside-out patches using a custom-made four-barrel glass  
625 perfusion tool (Vitrocom). For most experiments we used 10 mM glutamate to activate, but for  
626 some experiments, 1 mM glutamate was applied with no detectable differences in UV induced  
627 effects. The perfusion tool was mounted on a piezo-electric transducer (Physik Instrument),  
628 which was controlled via the digitizer interface (Instrutech ITC-18, HEKA Instrument).  
629 Borosilicate glass electrodes had resistance of 3-5 MΩ. Patches were clamped at -40 to -60 mV.  
630 Currents were filtered at 10 kHz and recorded at 40 kHz sampling rate using Axograph X  
631 (Axograph Scientific, Sydney, Australia). Macroscopic currents were elicited by applying the  
632 ligand for 400 ms. We exposed patches to UV light via epi-illumination from a Rapp UVICO  
633 source with a shutter under computer control. For state-dependent receptor trapping, patches  
634 were exposed to UV light when the receptor was either in the resting (before glutamate  
635 application), desensitised (during glutamate application) or in the active state (during  
636 glutamate application on L483Y-mutants) for 50 ms to 200 ms in each episode. It was not  
637 possible to record macroscopic currents from GluA2-F608AzF harbouring the L483Y mutation,  
638 so in this case 100 µM cyclothiazide (Ascent Scientific) was applied to trap the receptor in an  
639 active state. All chemicals were purchased from Roth unless otherwise noted.

640

### 641 **Kinetic Modelling**

642 Simulated responses to glutamate for a set of kinetic models were generated using the Aligator  
643 scripts ([www.github.com/aplested](http://www.github.com/aplested)). Families of responses were generated by changing  
644 individual rate constants progressively, and correcting for microscopic reversibility on loops.  
645 These were adapted from previously used code to allow the conductance of states to change  
646 across a set of simulated currents, in order to mimic the desensitised state becoming  
647 conductive.

648

### 649 **Structural Analysis**

650 We aligned the C-alpha atoms of residues 510-620 and 795-810 from chains A & C of GluA2  
651 from six CryoEM and crystal structures: 5VOT, 5WEO (open), 5WEK, 5L1B (resting), 5VHZ,  
652 5V0V (desensitised) (Yelshanskaya et al., 2016b; Twomey et al., 2017a; Twomey et al., 2017b;  
653 Chen et al., 2017) using the PyMol command "Align". The selection of residues was interactively  
654 checked and chosen to give the most reliable alignment across all four subunits. Distances were  
655 taken between C-alpha atoms in the same chains for separate structures (for residue  
656 displacements), and between diametrically opposed chains in the same structures (for axial  
657 distances). Scripting was done in the Anaconda distribution of Python supplied with PyMol 2.0  
658 (Schrödinger).

659

### 660 **Biochemistry**

661 For biochemical experiments HEK293T cells were plated in dishes of 10 cm diameter and  
662 transfected as described above (cell culture and transfection). Three days after transfection the  
663 cells were exposed to UV light ( $\sim 300 \text{ W/m}^2$ ) on ice in a ventilated chamber (Luzchem, LZC-1)  
664 for 2-15 minutes. UV induced crosslinking was performed in the presence of 40 mM N-ethyl-  
665 maleimide (NEM, Thermo Fisher Scientific), to reduce spurious dimer formation from free  
666 cysteines following denaturation. Cells were harvested immediately after UV exposure, lysed in  
667 buffer containing 1% dodecylmaltoside (Glycon Biochemicals) and 40 mM NEM. Lysates were  
668 incubated with ANTI-FLAG M2 Affinity Gel (Sigma-Aldrich) and column purified (illustra  
669 MicroSpin, GE Healthcare). NEM inhibits TEV protease, therefore it was necessary to wash the  
670 samples extensively during purification to remove NEM before adding TEV protease for  
671 overnight digestion (TEV Protease, Protean). The second elution round was loaded on 4-12%  
672 NuPAGE Novex gels (Invitrogen) and run in reducing conditions in presence of 500 mM 2-  
673 Mercaptoethanol (Sigma-Aldrich) at 200 mV for 2 h. Transfer of the proteins to PVDF  
674 membranes (Immobilon- FL Millipore) was done using XCell surelock mini-cell and XCell II Blot  
675 Module (Invitrogen) as described in the manufacturer's instructions. To enable quantitative  
676 detection of N- and C-terminal reactive bands in the same blot, membranes were incubated  
677 overnight at 4°C with polyclonal rabbit anti-GluR2/3 antibody (1:1000, Millipore) and  
678 monoclonal mouse anti-FLAG M2 antibody (1:1000, Sigma-Aldrich) respectively. The day after,  
679 infra-red dyes conjugated to secondary antibodies (IRDye 800CW Goat anti-mouse and IRDye  
680 680RD Goat anti-Rabbit, Li-COR) were applied to the membranes for 1h at room temperature.  
681 The signal produced was detected on a LI-COR Odyssey Fc imager and quantified using  
682 ImageStudioLite2. As a control of readthrough the constructs containing an amber TAG stop  
683 codon at various positions in the GluA2 TMD were co-expressed with the tRNA and tRNA-  
684 synthetase in the absence of UAA, whereas WT controls were co-expressed with the tRNA and  
685 tRNA-synthetase in presence of UAA, to check for adventitious incorporation of UAA.

686

687 **Electrophysiology data analysis**

688 Deactivation and desensitization were fit with either single or double exponential functions. To  
689 measure recovery from desensitization, two pulses of glutamate were applied in one episode  
690 with varying interpulse intervals. Recovery data were fit with a Hodgkin-Huxley type function  
691 (Carbone and Plested, 2012) with a slope of 2, except where noted. Kymograms of peak current  
692 reduction were fit with single exponential decay function. Statistical significance was assessed  
693 with Student's *t* test, using either pairwise comparisons for different values from a single patch  
694 recording or unpaired tests for comparisons between mutants or different conditions. For  
695 multiple comparisons of the measurements before, during and after UV exposure of the  
696 F579AzF mutant, we performed repeated measures ANOVA.

697 **Acknowledgements**

698 We are grateful to Thomas Sakmar (Rockefeller University) for providing the RNA-synthetase  
699 and tRNA plasmids. This work was funded by the Deutsche Forschungsgemeinschaft (DFG)  
700 Cluster of Excellence "NeuroCure" (EXC-257), DFG PL619-2 and SFB/TRR 186 to A.J.R.P. M.H.P.  
701 was recipient of fellowships from the Carlsberg foundation and the Danish Council for  
702 Independent Research. V.K. and A.P. both received stipends from the NeuroCure Cluster.

703

704 **Competing interests**

705 The authors declare no financial and non-financial competing interests.

706

707 **Author contributions**

708 All authors designed the experiments. All authors performed the experiments and/or analysed  
709 data. All authors read the manuscript. M.H.P., A.P. and A.J.R.P. wrote and edited the manuscript.

710 **Bibliography**

- 711 Ahmed, A. H., Wang, S., Chuang, H.-H., and Oswald, R. E. (2011). Mechanism of AMPA receptor  
712 activation by partial agonists: disulfide trapping of closed lobe conformations. *J Biol Chem* *286*,  
713 35257-35266.
- 714 Alsaloum, M., Kazi, R., Gan, Q., Amin, J., and Wollmuth, L. P. (2016). A Molecular Determinant of  
715 Subtype-Specific Desensitization in Ionotropic Glutamate Receptors. *J Neurosci* *36*, 2617-2622.
- 716 Amin, J. B., Salussolia, C. L., Chan, K., Regan, M. C., Dai, J., Zhou, H. X., Furukawa, H., Bowen, M. E.,  
717 and Wollmuth, L. P. (2017). Divergent roles of a peripheral transmembrane segment in AMPA  
718 and NMDA receptors. *J Gen Physiol* *149*, 661-680.
- 719 Armstrong, N., Jasti, J., Beich-Frandsen, M., and Gouaux, E. (2006). Measurement of  
720 conformational changes accompanying desensitization in an ionotropic glutamate receptor. *Cell*  
721 *127*, 85-97.
- 722 Baranovic, J., Chebli, M., Salazar, H., Carbone, A. L., Faelber, K., Lau, A. Y., Daumke, O., and Plested,  
723 A. J. (2016). Dynamics of the Ligand Binding Domain Layer during AMPA Receptor Activation.  
724 *Biophys J* *110*, 896-911.
- 725 Blunck, R., Cordero-Morales, J. F., Cuello, L. G., Perozo, E., and Bezanilla, F. (2006). Detection of  
726 the opening of the bundle crossing in KcsA with fluorescence lifetime spectroscopy reveals the  
727 existence of two gates for ion conduction. *J Gen Physiol* *128*, 569-581.
- 728 Carbone, A. L., and Plested, A. J. R. (2012). Coupled control of desensitization and gating by the  
729 ligand binding domain of glutamate receptors. *Neuron* *74*, 845-857.
- 730 Carbone, A. L., and Plested, A. J. R. (2016). Superactivation of AMPA receptors by auxiliary  
731 proteins. *Nat Commun* *7*, 10178.
- 732 Chen, L., Dürr, K. L., and Gouaux, E. (2014). X-ray structures of AMPA receptor-cone snail toxin  
733 complexes illuminate activation mechanism. *Science* *345*, 1021-1026.
- 734 Chen, S., Zhao, Y., Wang, Y., Shekhar, M., Tajkhorshid, E., and Gouaux, E. (2017). Activation and  
735 Desensitization Mechanism of AMPA Receptor-TARP Complex by Cryo-EM. *Cell* *170*, 1234-  
736 1246.e14.
- 737 Contreras, J. E., Srikumar, D., and Holmgren, M. (2008). Gating at the selectivity filter in cyclic  
738 nucleotide-gated channels. *Proceedings of the National Academy of Sciences* *105*, 3310.
- 739 del Camino, D., and Yellen, G. (2001). Tight Steric Closure at the Intracellular Activation Gate of a  
740 Voltage-Gated K<sup>+</sup> Channel. *Neuron* *32*, 649-656.
- 741 Devaraneni, P. K., Komarov, A. G., Costantino, C. A., Devereaux, J. J., Matulef, K., and Valiyaveetil,  
742 F. I. (2013). Semisynthetic K<sup>+</sup> channels show that the constricted conformation of the  
743 selectivity filter is not the C-type inactivated state. *Proc Natl Acad Sci U S A* *110*, 15698-15703.
- 744 Dürr, K. L., Chen, L., Stein, R. A., De Zorzi, R., Folea, I. M., Walz, T., Mchaourab, H. S., and Gouaux,  
745 E. (2014). Structure and Dynamics of AMPA Receptor GluA2 in Resting, Pre-Open, and  
746 Desensitized States. *Cell* *158*, 778-792.
- 747 Grosman, C., Zhou, M., and Auerbach, A. (2000). Mapping the conformational wave of  
748 acetylcholine receptor channel gating. *Nature* *403*, 773-776.
- 749 Hino, N., Hayashi, A., Sakamoto, K., and Yokoyama, S. (2006). Site-specific incorporation of non-  
750 natural amino acids into proteins in mammalian cells with an expanded genetic code. *Nat Protoc*  
751 *1*, 2957-2962.
- 752 Horning, M. S., and Mayer, M. L. (2004). Regulation of AMPA receptor gating by ligand binding  
753 core dimers. *Neuron* *41*, 379-388.
- 754 Klippenstein, V., Hoppmann, C., Ye, S., Wang, L., and Paoletti, P. (2017). Optocontrol of glutamate  
755 receptor activity by single side-chain photoisomerization. *Elife* *6*,
- 756 Klippenstein, V., Ghisi, V., Wietstruk, M., and Plested, A. J. R. (2014). Photoinactivation of  
757 glutamate receptors by genetically encoded unnatural amino acids. *J Neurosci* *34*, 980-991.
- 758 Kuner, T., Beck, C., Sakmann, B., and Seeburg, P. H. (2001). Channel-lining residues of the AMPA  
759 receptor M2 segment: structural environment of the Q/R site and identification of the selectivity  
760 filter. *J Neurosci* *21*, 4162-4172.
- 761 Kuner, T., Seeburg, P. H., and Guy, H. R. (2003). A common architecture for K<sup>+</sup> channels and  
762 ionotropic glutamate receptors. *Trends Neurosci* *26*, 27-32.

- 763 Labro, A. J., Cortes, D. M., Tilegenova, C., and Cuello, L. G. (2018). Inverted allosteric coupling  
764 between activation and inactivation gates in K<sup>+</sup> channels. *Proc Natl Acad Sci U S A* *115*, 5426-  
765 5431.
- 766 Lau, A. Y., Salazar, H., Blachowicz, L., Ghisi, V., Plested, A. J. R., and Roux, B. (2013). A  
767 conformational intermediate in glutamate receptor activation. *Neuron* *79*, 492-503.
- 768 Martin, G. M., Rex, E. A., Devaraneni, P., Denton, J. S., Boodhansingh, K. E., DeLeon, D. D., Stanley,  
769 C. A., and Shyng, S. L. (2016). Pharmacological Correction of Trafficking Defects in ATP-sensitive  
770 Potassium Channels Caused by Sulfonyleurea Receptor 1 Mutations. *J Biol Chem* *291*, 21971-  
771 21983.
- 772 Murray, C. I., Westhoff, M., Eldstrom, J., Thompson, E., Emes, R., and Fedida, D. (2016). Unnatural  
773 amino acid photo-crosslinking of the IKs channel complex demonstrates a KCNE1:KCNQ1  
774 stoichiometry of up to 4:4. *Elife* *5*,
- 775 Naganathan, S., Ye, S., Sakmar, T. P., and Huber, T. (2013). Site-specific epitope tagging of G  
776 protein-coupled receptors by bioorthogonal modification of a genetically encoded unnatural  
777 amino acid. *Biochemistry* *52*, 1028-1036.
- 778 Oelstrom, K., Goldschen-Ohm, M. P., Holmgren, M., and Chanda, B. (2014). Evolutionarily  
779 conserved intracellular gate of voltage-dependent sodium channels. *Nat Commun* *5*, 3420.
- 780 Ogden, K. K., Chen, W., Swanger, S. A., McDaniel, M. J., Fan, L. Z., Hu, C., Tankovic, A., Kusumoto,  
781 H., Kosobucki, G. J., Schulien, A. J., Su, Z., Pecha, J., Bhattacharya, S., Petrovski, S., Cohen, A. E.,  
782 Aizenman, E., Traynelis, S. F., and Yuan, H. (2017). Molecular Mechanism of Disease-Associated  
783 Mutations in the Pre-M1 Helix of NMDA Receptors and Potential Rescue Pharmacology. *PLoS*  
784 *Genet* *13*, e1006536.
- 785 Posson, D. J., McCoy, J. G., and Nimigean, C. M. (2013). The voltage-dependent gate in MthK  
786 potassium channels is located at the selectivity filter. *Nat Struct Mol Biol* *20*, 159-166.
- 787 Riva, I., Eibl, C., Volkmer, R., Carbone, A. L., and Plested, A. J. (2017). Control of AMPA receptor  
788 activity by the extracellular loops of auxiliary proteins. *Elife* *6*,
- 789 Salussolia, C. L., Corrales, A., Talukder, I., Kazi, R., Akgul, G., Bowen, M., and Wollmuth, L. P.  
790 (2011). Interaction of the M4 segment with other transmembrane segments is required for  
791 surface expression of mammalian  $\alpha$ -amino-3-hydroxy-5-methyl-4-isoxazolepropionic acid  
792 (AMPA) receptors. *J Biol Chem* *286*, 40205-40218.
- 793 Salussolia, C. L., Gan, Q., Kazi, R., Singh, P., Allopenna, J., Furukawa, H., and Wollmuth, L. P.  
794 (2013). A eukaryotic specific transmembrane segment is required for tetramerization in AMPA  
795 receptors. *J Neurosci* *33*, 9840-9845.
- 796 Sobolevsky, A. I., Yelshansky, M. V., and Wollmuth, L. P. (2004). The outer pore of the glutamate  
797 receptor channel has 2-fold rotational symmetry. *Neuron* *41*, 367-378.
- 798 Sobolevsky, A. I., Rosconi, M. P., and Gouaux, E. (2009). X-ray structure, symmetry and  
799 mechanism of an AMPA-subtype glutamate receptor. *Nature* *462*, 745-756.
- 800 Sobolevsky, A. I., Yelshansky, M. V., and Wollmuth, L. P. (2003). Different gating mechanisms in  
801 glutamate receptor and K<sup>+</sup> channels. *J Neurosci* *23*, 7559-7568.
- 802 Sobolevsky, A. I., Yelshansky, M. V., and Wollmuth, L. P. (2005). State-dependent changes in the  
803 electrostatic potential in the pore of a GluR channel. *Biophys J* *88*, 235-242.
- 804 Sun, Y., Olson, R., Horning, M., Armstrong, N., Mayer, M., and Gouaux, E. (2002). Mechanism of  
805 glutamate receptor desensitization. *Nature* *417*, 245-253.
- 806 Thompson, J., and Begenisich, T. (2012). Selectivity filter gating in large-conductance Ca(2+)-  
807 activated K<sup>+</sup> channels. *J Gen Physiol* *139*, 235-244.
- 808 Tian, M., and Ye, S. (2016). Allosteric regulation in NMDA receptors revealed by the genetically  
809 encoded photo-cross-linkers. *Sci Rep* *6*, 34751.
- 810 Tilegenova, C., Cortes, D. M., and Cuello, L. G. (2017). Hysteresis of KcsA potassium channel's  
811 activation- deactivation gating is caused by structural changes at the channel's selectivity filter.  
812 *Proc Natl Acad Sci U S A* *114*, 3234-3239.
- 813 Tomita, S., Adesnik, H., Sekiguchi, M., Zhang, W., Wada, K., Howe, J. R., Nicoll, R. A., and Brecht, D.  
814 S. (2005). Stargazin modulates AMPA receptor gating and trafficking by distinct domains.  
815 *Nature* *435*, 1052-1058.

816 Twomey, E. C., Yelshanskaya, M. V., Grassucci, R. A., Frank, J., and Sobolevsky, A. I. (2017a).  
817 Channel opening and gating mechanism in AMPA-subtype glutamate receptors. *Nature*  
818 Twomey, E. C., Yelshanskaya, M. V., Grassucci, R. A., Frank, J., and Sobolevsky, A. I. (2017b).  
819 Structural Bases of Desensitization in AMPA Receptor-Auxiliary Subunit Complexes. *Neuron* *94*,  
820 569-580.e5.  
821 Xu, Y., Ramu, Y., Shin, H.-G., Yamakaze, J., and Lu, Z. (2013). Energetic role of the paddle motif in  
822 voltage gating of Shaker K(+) channels. *Nat Struct Mol Biol* *20*, 574-581.  
823 Ye, S., Huber, T., Vogel, R., and Sakmar, T. P. (2009). FTIR analysis of GPCR activation using azido  
824 probes. *Nat Chem Biol* *5*, 397-399.  
825 Ye, S., Köhrer, C., Huber, T., Kazmi, M., Sachdev, P., Yan, E. C. Y., Bhagat, A., RajBhandary, U. L., and  
826 Sakmar, T. P. (2008). Site-specific incorporation of keto amino acids into functional G protein-  
827 coupled receptors using unnatural amino acid mutagenesis. *J Biol Chem* *283*, 1525-1533.  
828 Ye, S., Zaitseva, E., Caltabiano, G., Schertler, G. F. X., Sakmar, T. P., Deupi, X., and Vogel, R. (2010).  
829 Tracking G-protein-coupled receptor activation using genetically encoded infrared probes.  
830 *Nature* *464*, 1386-1389.  
831 Yelshanskaya, M. V., Saotome, K., Singh, A. K., and Sobolevsky, A. I. (2016a). Probing  
832 Intersubunit Interfaces in AMPA-subtype Ionotropic Glutamate Receptors. *Sci Rep* *6*, 19082.  
833 Yelshanskaya, M. V., Mesbahi-Vasey, S., Kurnikova, M. G., and Sobolevsky, A. I. (2017). Role of the  
834 Ion Channel Extracellular Collar in AMPA Receptor Gating. *Sci Rep* *7*, 1050.  
835 Yelshanskaya, M. V., Singh, A. K., Sampson, J. M., Narangoda, C., Kurnikova, M., and Sobolevsky, A.  
836 I. (2016b). Structural Bases of Noncompetitive Inhibition of AMPA-Subtype Ionotropic  
837 Glutamate Receptors by Antiepileptic Drugs. *Neuron* *91*, 1305-1315.  
838 Zachariassen, L. G., Katchan, L., Jensen, A. G., Pickering, D. S., Plested, A. J., and Kristensen, A. S.  
839 (2016). Structural rearrangement of the intracellular domains during AMPA receptor activation.  
840 *Proc Natl Acad Sci U S A* *113*, E3950-9.  
841 Zhao, Y., Chen, S., Yoshioka, C., Bacongus, I., and Gouaux, E. (2016). Architecture of fully  
842 occupied GluA2 AMPA receptor-TARP complex elucidated by cryo-EM. *Nature*  
843 Zhou, Y., Xia, X. M., and Lingle, C. J. (2011). Cysteine scanning and modification reveal major  
844 differences between BK channels and Kv channels in the inner pore region. *Proc Natl Acad Sci U*  
845 *S A* *108*, 12161-12166.  
846  
847



848 **Supplementary Material**

849

850 **Movie 1 Gating modules**

851 Residues corresponding to three spatially contiguous gating modules in the GluA2 pore domain  
852 are shown. The collar (green), the bundle crossing (magenta) and the selectivity filter  
853 (F579AzF, cyan) are flanked by the null mutants (wheat).

854

855 **Supplementary Table 1: Western blot analysis.**

856 **Supplementary Table 2: Kinetics of glutamate responses of selected constructs.**

857 **Supplementary Table 3: Summary of UV-induced changes in glutamate response.**

858 **Supplementary Table 4: Amplitudes of control and “readthrough” currents.**

859

860

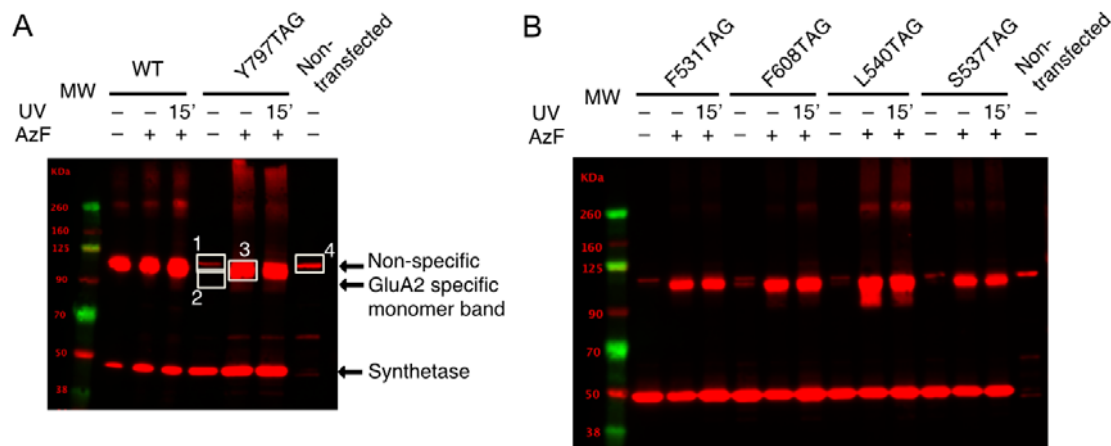

861

862

863 **Supplementary Figure 1. Representative Western blots of GluA2 TAG mutants rescued by AzF**  
 864 **incorporation.**

865 **A** Estimation of the enrichment of expression by AzF for the Y797TAG mutant. Western blotting  
 866 against the FLAG epitopes on GluA2 and the tRNA synthetase also reveals a non-specific band  
 867 around 100 kDa, similar in size to monomeric GluA2 (indicated for non-transfected HEK 293-T  
 868 cells with white box #4). Since we could not separate the non-specific band from actual rescue  
 869 in presence of UAA, we calculated minimum enrichment following inclusion of AzF by taking the  
 870 ratio of densitometric measurement including the non-specific band (Box #3 / [Box #1 + Box  
 871 #2]) or the maximum enrichment by excluding the non-specific band (Box #3/ Box #2). **B**  
 872 Typical Western blot for measurement of enrichment following AzF inclusion in culture media  
 873 for four TAG mutants of GluA2. Dimeric fractions can be seen around 260 kDa for L540, but  
 874 these were not enhanced by UV (15' exposure).  
 875

876

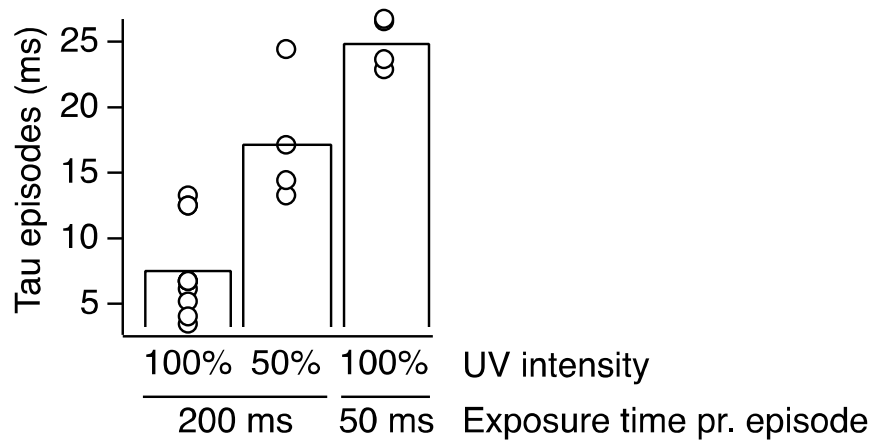

877

878

879

880 **Supplementary Figure 2. Dependency on UV intensity and exposure time.**

881 Summary of the exponential half-times of GluA2-F608AzF inactivation, plotted against the UV  
882 exposure periods per episode in milliseconds. The rate of peak current reduction could be  
883 manipulated by changing the intensity of the UV light from 100% ( $\tau$  200ms,100% = 7 ms) to  
884 50% ( $\tau$  200ms,50% = 17 ms) or reducing the time interval of UV exposure to 50 ms ( $\tau$   
885 50ms,100% = 25 ms), verifying that the peak-current reduction is controlled by UV light.

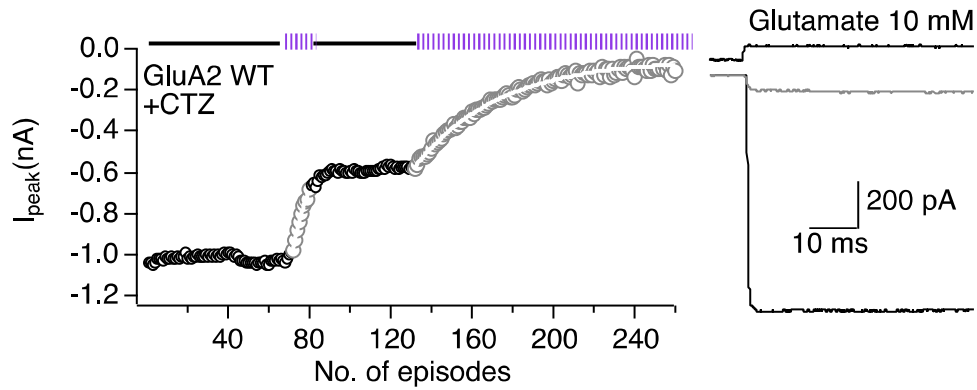

886

887

888 **Supplementary Figure 3. UV-induced inhibition of GluA2 wild-type in the presence of CTZ.**

889 UV exposures resulted in a decrease in the peak current after the application of glutamate and

890 100  $\mu$ M CTZ. This effect was irregular and showed batch to batch variation (compare with

891 Klippenstein et al. 2014). *Left*; Example kymogram illustrates the UV inactivation of GluA2 WT

892 due to the presence of CTZ, plotted as described in the legend to **Figure 3**. *Right*; Example

893 responses from the beginning (black) and end of the kymogram (grey).

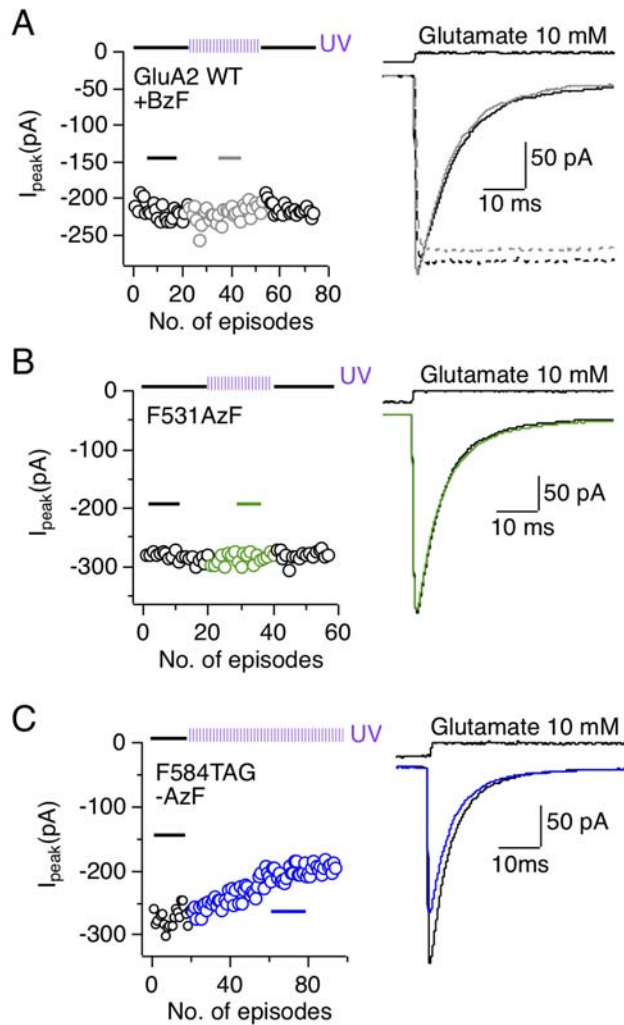

894

895 **Supplementary Figure 4. Three null results of UV exposure.**

896 **A** UV exposure did not change the glutamate response for the GluA2 WT cultured in the  
897 presence of BzF and the appropriate tRNA-synthetase pair. Kymogram (*left*) as described in  
898 Figure 3A-E illustrates the time course of UV exposure, and example currents (*right*) from  
899 sections of the histogram labeled with a solid line. The effect of UV exposure in the active state  
900 of the GluA2 WT was also tested by introducing the L483Y mutation to block desensitization  
901 (dotted lines). **B** GluA2-F531AzF was insensitive to UV. **C** All tested TAG mutants that were not  
902 rescued with an UAA, but that gave a current due to read through, were also insensitive to UV,  
903 as exemplified by F584TAG. This patch exhibited a constant mild rundown, independent of the  
904 UV exposure.

905  
906

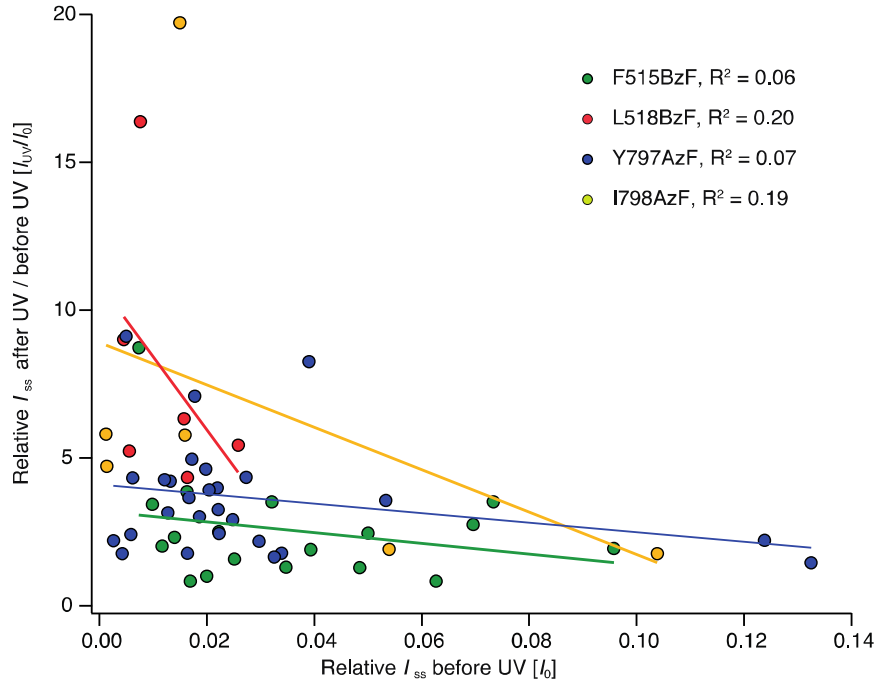

907  
908

909 **Supplementary Figure 5. Relation between the initial steady-state current and photopotential.**

910 Graph showing the absence of correlation between relative steady-state currents ( $I_{ss}/I_{peak}$ )  
911 before UV application ( $I_0$ ) and the fold change in relative steady-state current ( $I_{ss}/I_{peak}$ ) before  
912 and after UV application ( $I_{UV}/I_0$ ) for the GluA2-F515BzF, -L518BzF, -Y797AzF and -I798AzF  
913 mutants. Thus, UV induced photopotential of the relative steady-state current was  
914 independent of the amplitude of the initial relative steady-state current.

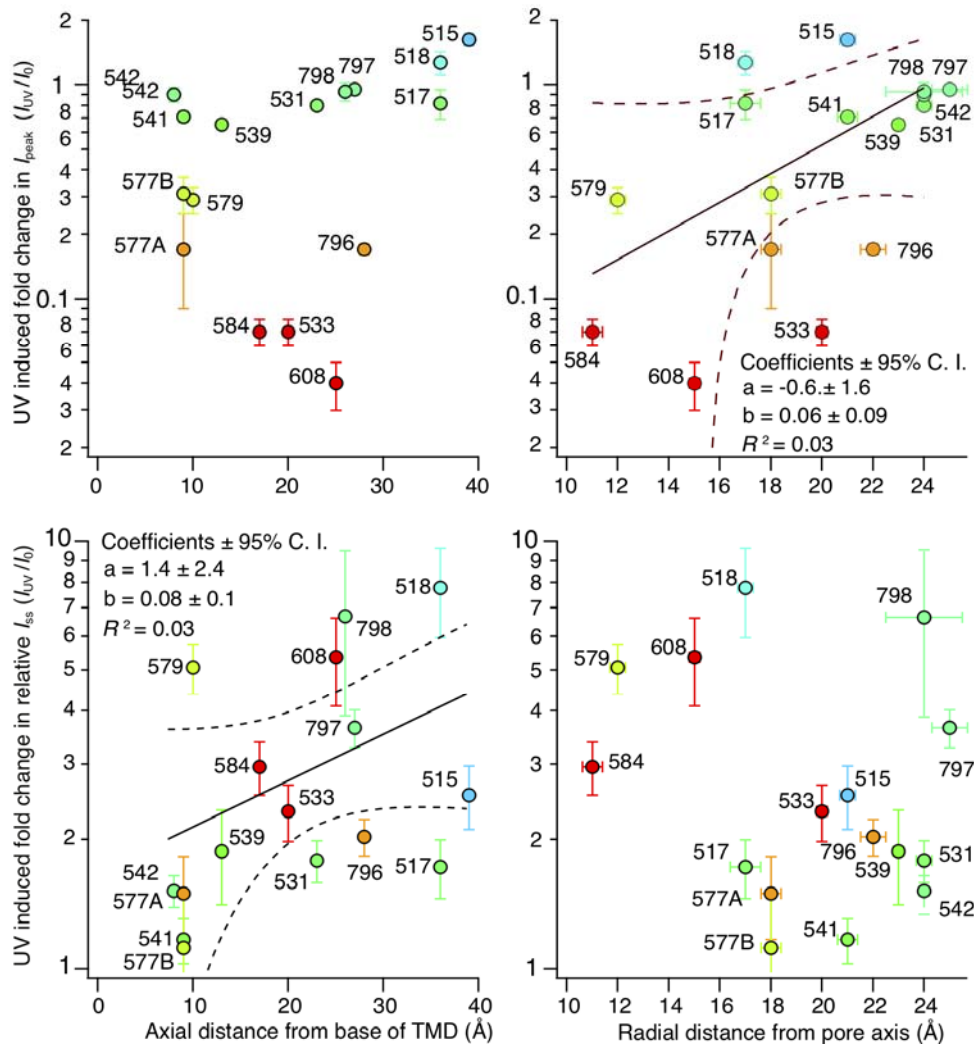

915

916 **Supplementary Figure 6. Comparing distances at photoactive sites and UV induced effects.**

917 The UV induced fold changes of peak currents (*upper panels*) and relative steady-state currents  
 918 ( $I_{\text{ss}}/I_{\text{peak}}$ ) (*lower panels*), of each mutant were plotted against the axial distance of UAA  
 919 insertion site from the base of the TMD (*left panels*) or the radial distance from the pore axis  
 920 (*right panels*) in Ångström. Distances were taken between the  $C_{\alpha}$  atoms of the UAA insertion  
 921 site and the base of the TMD (L817) or between  $C_{\alpha}$  atoms of the UAA insertion site in  
 922 diametrically opposed chains. The sites are color-coded according to their UV-induced fold  
 923 change in peak current (as in Figure 6B). 577A and 577B denotes the insertion of AzF and BzF,  
 924 respectively, at this particular site.

925

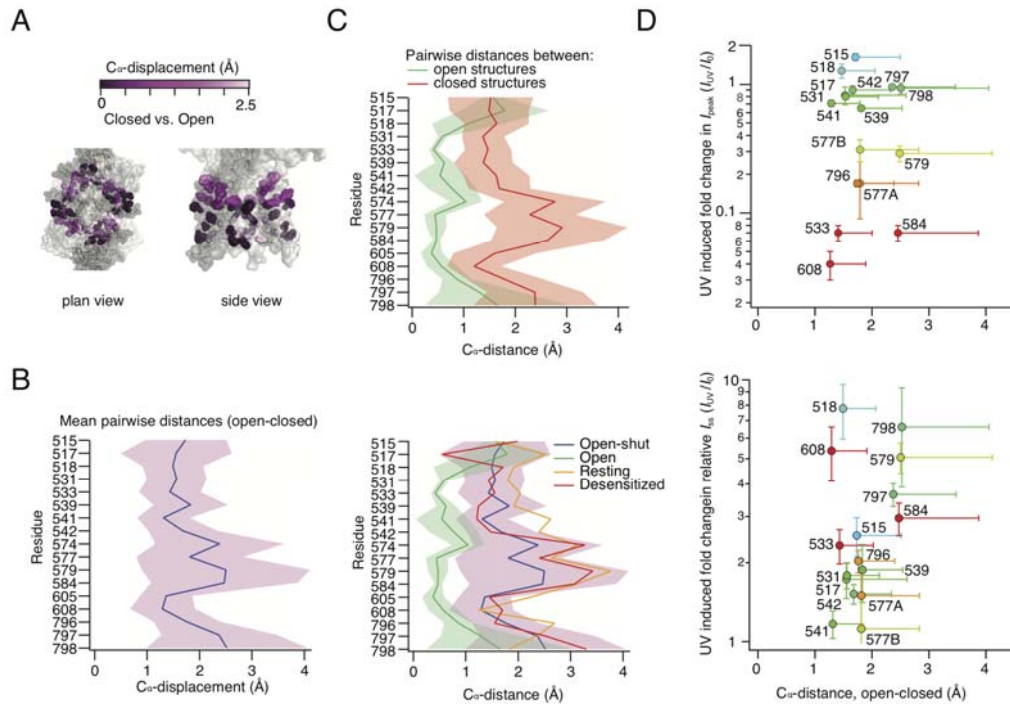

926

927

**Supplementary Figure 7. Amino acid displacements in published structures.**

928 **A** Colored bar (*upper*) shows the used color code for  $C_{\alpha}$ -displacement in Ångström of the  
 929 AzF/BzF insertion sites between resting (PDB ID: 3kg2) and active (PDB ID: 5weo) state. Dark  
 930 magenta indicates no to very small movements, whereas light magenta indicates bigger  
 931 movements. Pymol figures (*bottom*) show selected insertion sites as spheres colored according  
 932 to its UV  $C_{\alpha}$ -displacement effect. **B** Relation between the  $C_{\alpha}$ -distances at the UAA insertion sites  
 933 in the open to closed state structures. **C** Structures were further divided into closed and open  
 934 (*upper panel*) and open-shut, open, resting and desensitized state (*lower panel*). **D** Graph  
 935 showing the  $C_{\alpha}$ -distance between open and closed structures and the site-specific UV-induced  
 936 effect on receptor peak current amplitude (*upper*) and relative steady-state current (*bottom*)  
 937 for each site of the TMD, respectively. The individual sites are color-coded according to the  
 938 specific UV-induced effects on peak current as in supplementary figure 6. Distances between  $C_{\alpha}$   
 939 atoms in the same chains were measured between open and closed channel structures. Errors  
 940 derive from variability in distances between different subunits and between different  
 941 structures.

942



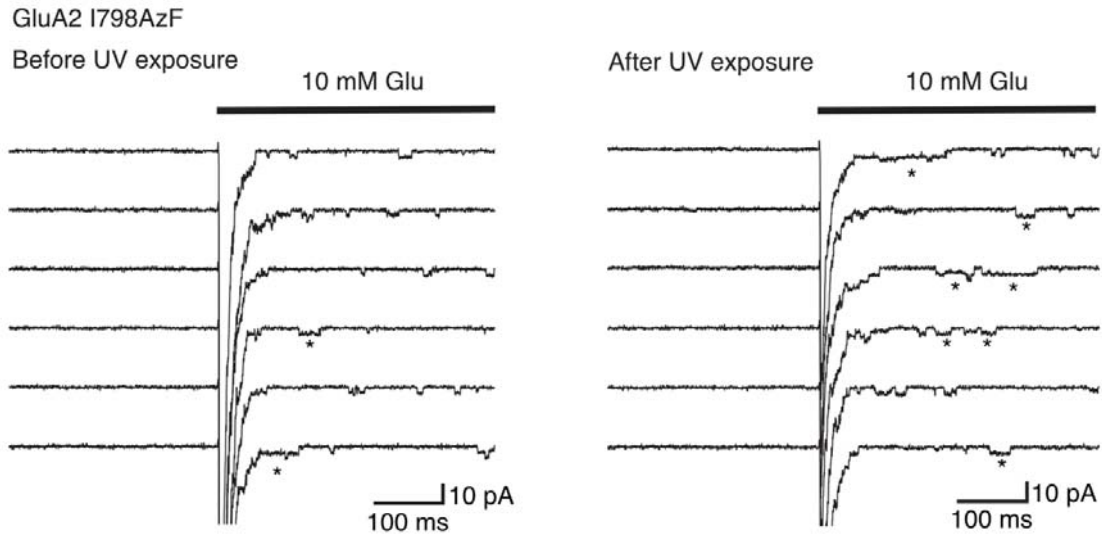

943  
944  
945  
946  
947  
948  
949  
950  
951

**Supplementary Figure 8. Photoactivation at I798AzF lengthens the activations of individual receptors.**

Representative desensitized traces from GluA2-I798AzF outside-out patches before (*left*) and after (*right*) UV exposure. After UV exposure, long bursts (>25 ms) with high open probability (\*) became much more prevalent. The traces were filtered at 1kHz. The holding voltage was -60 mV.
